# Supplementary material for: Metabolic Reprogramming in Leaf Lettuce Grown Under Different Light Quality and Intensity Conditions Using Narrow-Band LEDs
Source: PubMed Central journal article supplement (PMC5962576; doi:10.1038/s41598-018-25686-0), 2018-05-21
Supplement: 41598_2018_25686_MOESM1_ESM.pdf [file 41598_2018_25686_MOESM1_ESM.pdf]

## **Metabolic Reprogramming in Leaf Lettuce Grown Under Different Light Quality and Intensity Conditions Using Narrow-Band LEDs**

### **Authors:**

Kazuyoshi Kitazaki<sup>1†</sup>, Atsushi Fukushima<sup>2</sup>, Ryo Nakabayashi<sup>2</sup>, Yozo Okazaki<sup>2</sup>, Makoto Kobayashi<sup>2</sup>, Tetsuya Mori<sup>2</sup>, Tomoko Nishizawa<sup>2</sup>, Sebastian Reyes-Chin-Wo<sup>3</sup>, Richard W. Michelmore<sup>3</sup>, Kazuki Saito<sup>2,4</sup>, Kazuhiro Shoji<sup>1\*</sup>, Miyako Kusano<sup>2,5\*</sup>

### **Affiliation:**

<sup>1</sup>*Central Research Institute of Electric Power Industry, Abiko, Chiba, 270-1194, Japan*

<sup>2</sup>*RIKEN Center for Sustainable Resource Science, Yokohama, Kanagawa, 230-0045, Japan*

<sup>3</sup>*UC Davis Genome Center, Davis, California, 95616, USA*

<sup>4</sup>*Graduate School of Pharmaceutical Sciences, Chiba University, Chiba, Chiba, 263-8522, Japan*

<sup>5</sup>*Graduate School of Life and Environmental Sciences, University of Tsukuba, Tsukuba, Ibaraki, 305-8572, Japan*

<sup>†</sup>*Present address: Research Faculty of Agriculture, Hokkaido University, Sapporo, Hokkaido, 060-8589, Japan*

Kazuyoshi Kitazaki and Atsushi Fukushima contributed equally to this work.

\*Correspondence: [shoji@criepi.denken.or.jp](mailto:shoji@criepi.denken.or.jp) and [kusano.miyako.fp@u.tsukuba.ac.jp](mailto:kusano.miyako.fp@u.tsukuba.ac.jp)

**Figure S1. Metabolomic characterisation of leaf lettuce exposed to blue and red LEDs.** (a) Principal component analysis (PCA) score scatter plot of metabolite profiles of lettuce samples in response to blue (B470, blue squares), red (R680, red inverted

triangles) and fluorescent light (FL, empty triangles) treatment. Metabolite profiles were obtained by combining GC-MS (GC), LC-MS (LC) and LC-ion trap-MS (IT) data. **(b)** Orthogonal Projection to Latent Structures Discriminant Analysis (O2PLS-DA) score scatter plot (upper part) and loading plot (bottom part) of metabolite profiles of lettuce samples by blue, red and FL treatment. Lettuce seedlings were grown under continuous blue, red or FL at  $100 \mu\text{mol}\cdot\text{m}^{-2}\cdot\text{s}^{-1}$  photosynthetic photon flux density (PPFD) for 1 week. Metabolites detected by GC, IT and LC are indicated using yellow circles, green rectangles and light blue triangles, respectively, in the loading plot. Data matrix consists of 19 samples and 235 identified/annotated peaks with three response factors as represented by  $\text{M8.DA}(1)\text{--}(3)$ . Cross validation-analysis of variance (CV-ANOVA) was performed to assess model reliability. CV-ANOVA  $p$ -value =  $3.52\text{E-}7$ . PC, principal component; Pred PC, predictive principal component.

**Figure S2. Box plots showing changes in the content of primary and secondary metabolites in the third leaf of lettuce plants grown under variable light quality for different durations at PPFD of  $300 \mu\text{mol}\cdot\text{m}^{-2}\cdot\text{s}^{-1}$  (P300).**

Black horizontal lines in the boxes represent the median, whereas the top and bottom of the boxes represent the upper (75th) and lower quartiles (25th), respectively. Circles show potential outliers. Six biological replicates were performed per condition. Values are normalised relative to those obtained from fluorescent light (FL) treatment (control). **a**, sugars and sugar alcohol; **b**, TCA-cycle intermediates; **c**, Gln, Glu and Asp; **d**, stress-related metabolites; **e**, branched-chain and aromatic amino acids; **f**, Ser/Gly and sulphur metabolism; **g**, chlorogenate and flavonoid metabolism; **h**, carotenoids and chlorophylls; **i**, sesquiterpene lactones. G6P, glucose-6-phosphate; F6P, fructose-6-phosphate; 2OG, 2-oxoglutarate; Gln, glutamine; Glu, glutamic acid; Asp, aspartic

acid; GABA, gamma-aminobutyric acid; Ser, serine; Gly, glycine; and OAS, *O*-acetylserine.

**Figure S3. Principal component analysis score scatter plots of leaf lettuce seedlings grown under different light qualities and intensities.** Metabolic responses of leaves treated with (a) short-term (1 day) and (b) long-term (7 days) exposure to different light qualities [FL, fluorescent light; B470, blue (470 nm); G510 and G520, green (510 and 524 nm, respectively); and R680, red (680 nm)] and intensities (P100 and P300). Each symbol indicates an independent plant sample in the score scatter plot (biological replicates,  $n = 6$ ).

**Figure S4. Venn diagrams showing differentially accumulated metabolites.** We analysed differentially accumulated metabolites from the lettuce samples irradiated different wavelength LEDs and intensities. We identified significantly changes in metabolite levels compared to FL condition using LIMMA<sup>71</sup>. (a) Increased metabolites and (b) decreased metabolites after 7 days of irradiation are shown. Significance level was set as follows,  $|\log_2\text{-foldchange}| \geq 1$ , false discovery rate (FDR)  $< 0.05$ . FL, fluorescent lamp.

**Figure S5. Sequencing statistics.**

Q20, quality score of 20; total clean nucleotides = total reads  $1 \times$  read 1 size + total reads  $2 \times$  read 2 sizes.

**Figure S6. Venn diagram representing differentially expressed genes (DEGs) overlapping among the samples irradiated with different LEDs and with fluorescent light (FL; control).**

The cutoff for significant DEGs was FDR  $< 0.05$  by LIMMA<sup>71</sup>. DEGs were visualised with Venny (<http://bioinfogp.cnb.csic.es/tools/venny/>).

**Figure S7. Overview of the transcript profiles associated with blue (B470; 470 nm) and green (G510; 510 nm) light responses.**

This information is based on Enrichment Map <sup>41,42</sup> (see the figure legend of Fig. 4 for details).

**Figure S8. Overview of the transcript profiles associated with blue (B470; 470 nm) and green (G520; 524 nm) light responses.**

This information is based on Enrichment Map <sup>41,42</sup> (see the figure legend of Fig. 4 for details).

**Figure S9. Overview of the transcript profiles associated with red (R680; 680 nm) and green (G520; 524 nm) light responses.**

This information is based on Enrichment Map <sup>41,42</sup> (see the figure legend of Fig. 4 for details).

**Figure S10. Overview of gene expression patterns of lettuce plants irradiated with green LED (GL) at PPFD of 300  $\mu\text{mol}\cdot\text{m}^{-2}\cdot\text{s}^{-1}$  (P300).**

We used MAPMAN software (<http://mapman.gabipd.org/web/guest/mapman>) <sup>67</sup>. (a) G510 (peak wavelength 510 nm). (b) G520 (peak wavelength 524 nm). Fold-changes in gene expression are normalised relative to white fluorescent light (FL) treatment.

Statistically significant changes in expression are identified by colour: red = up-regulated by GL treatment and blue = down-regulated by GL treatment.

**Figure S11. qRT-PCR validation of RNA-Seq data obtained from lettuce plants grown under high-intensity light (P300).** Plants of red leaf lettuce were exposed to different light qualities [FL = fluorescent lamp, B470 = blue (470 nm), G510 and G520 = green (510 and 524 nm, respectively), R680 = red (680 nm) LEDs] for 24 h.

Expression levels of six genes involved in flavonoid biosynthesis were investigated

using qRT-PCR, including *phenylalanine ammonia-lyase (PAL)*, *chalcone synthase (CHS)*, *flavanone 3-hydroxylase (F3H)*, *dihydroflavonol 4-reductase (DFR)*, *anthocyanidin synthase (ANS)* and *UDP-glucose:flavonoid 3-O-glucosyltransferase (UGT)*. Three biological replicates were performed for each gene. Error bars represent standard deviation. Welch's *t*-test was used to calculate *p*-values. Statistically significant differences in expression levels are indicated using an asterisk ( $p < 0.05$ ). Gene-specific primers used for qRT-PCR are listed in Supplementary Table S3. d, day.

**Figure S12. Spectral photon flux distributions of lights used for growing leaf lettuce in this study.**

(a) White fluorescent light (FL). (b) LEDs, B470: peak wavelength of 470 nm, G510: peak wavelength of 510 nm, G520: peak wavelength of 524 nm, R680: peak wavelength of 680 nm. The total photosynthetic photon flux (PPF) was  $100 \mu\text{mol}\cdot\text{m}^{-2}\cdot\text{s}^{-1}$  for each treatment.

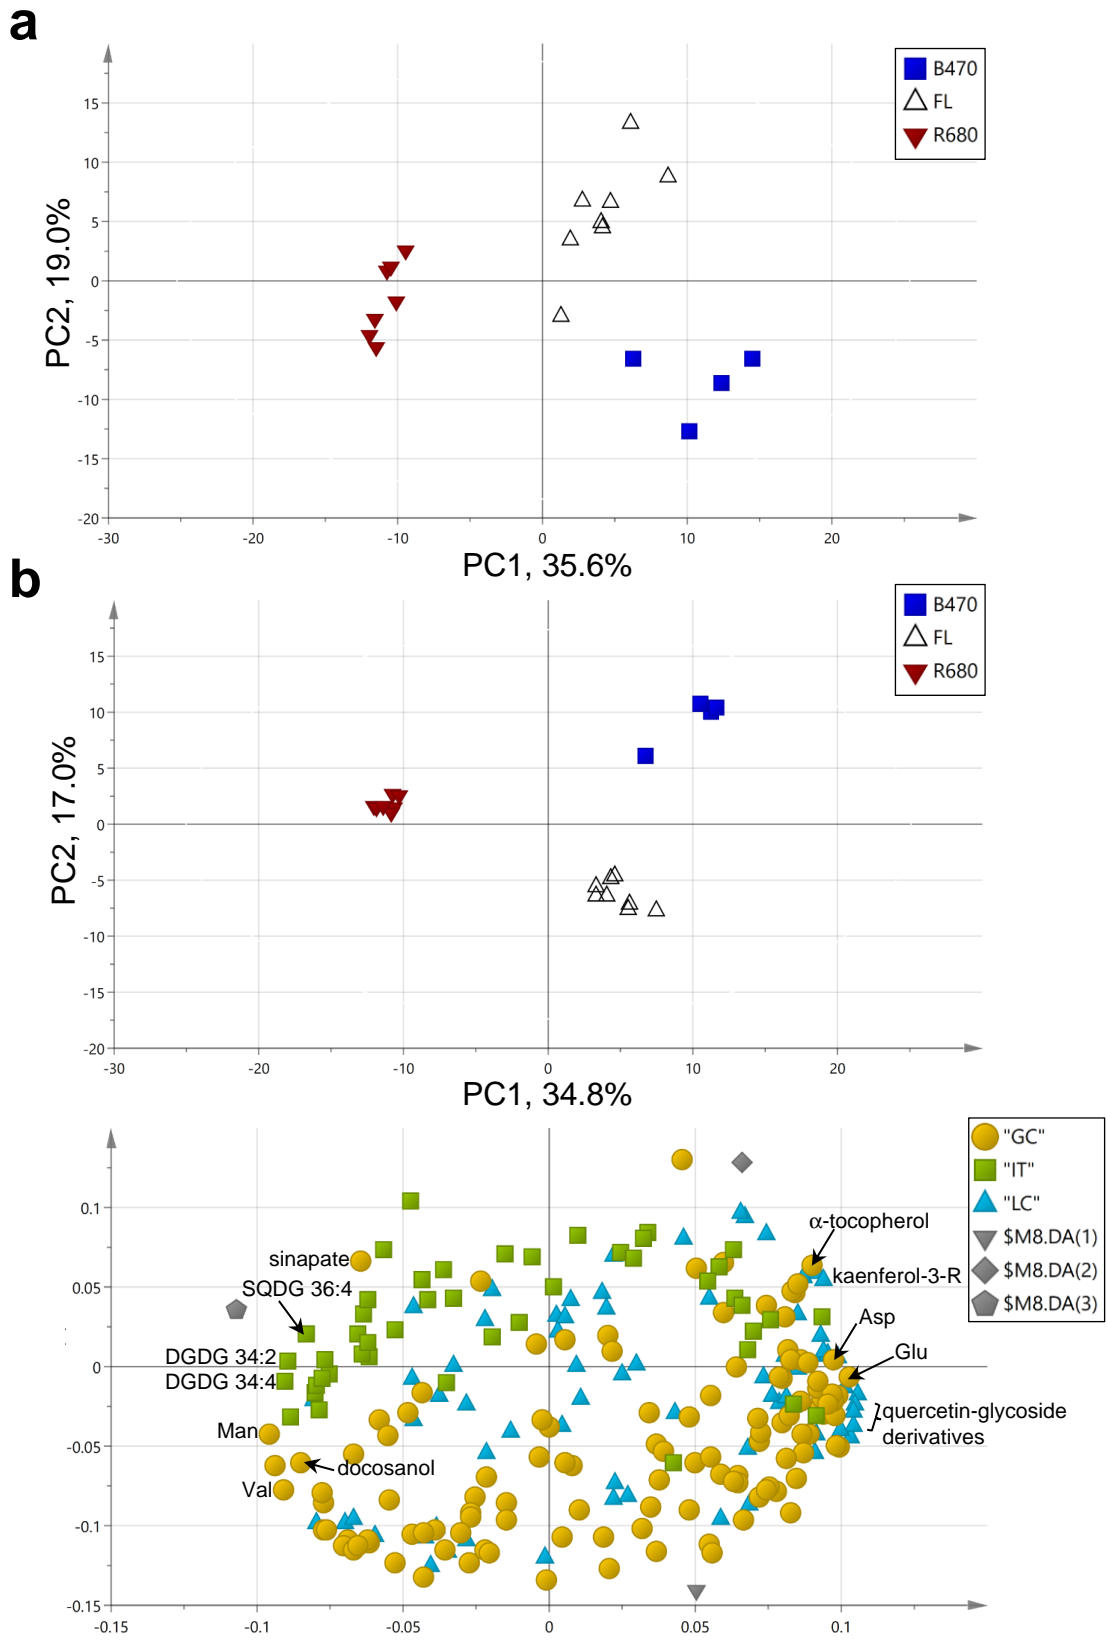

**Figure S1**

**a** Sugar and sugar alcohol

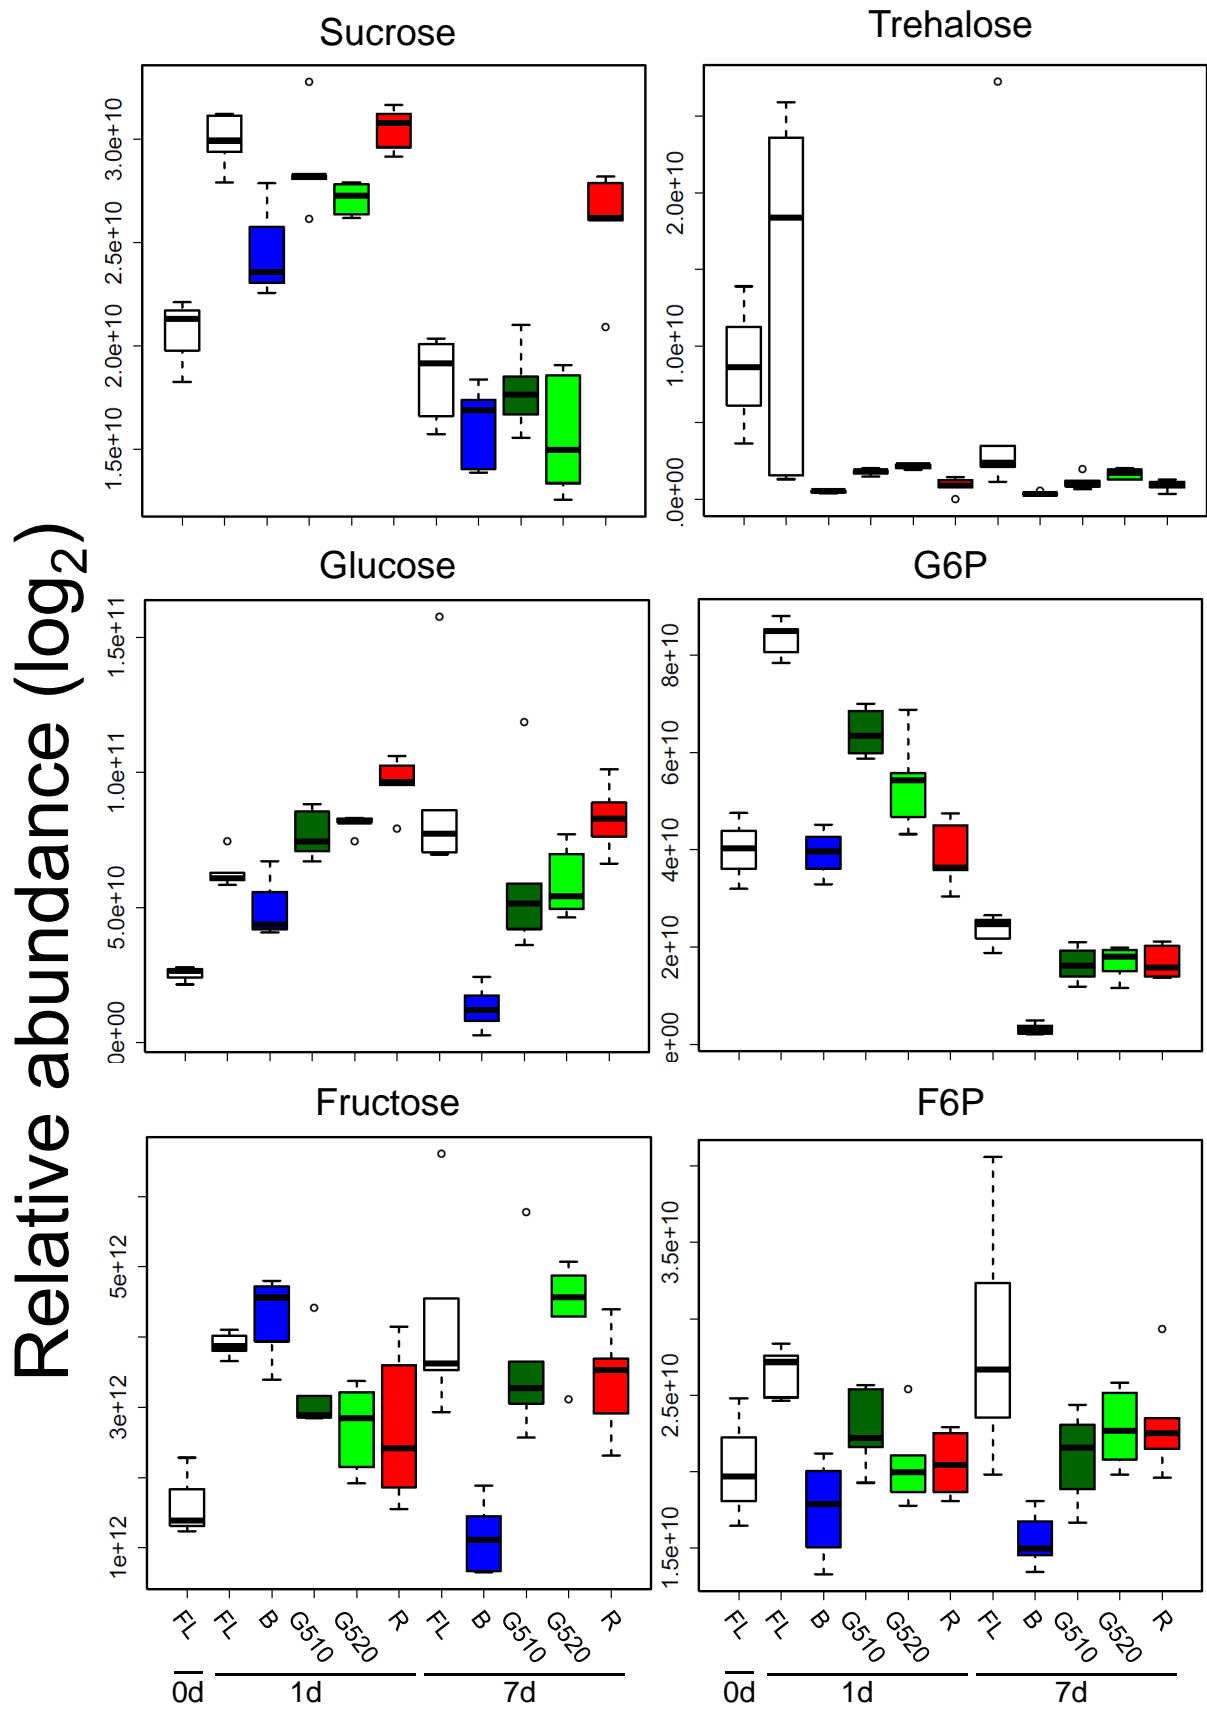

**Figure S2**

**b** TCA-cycle intermediates

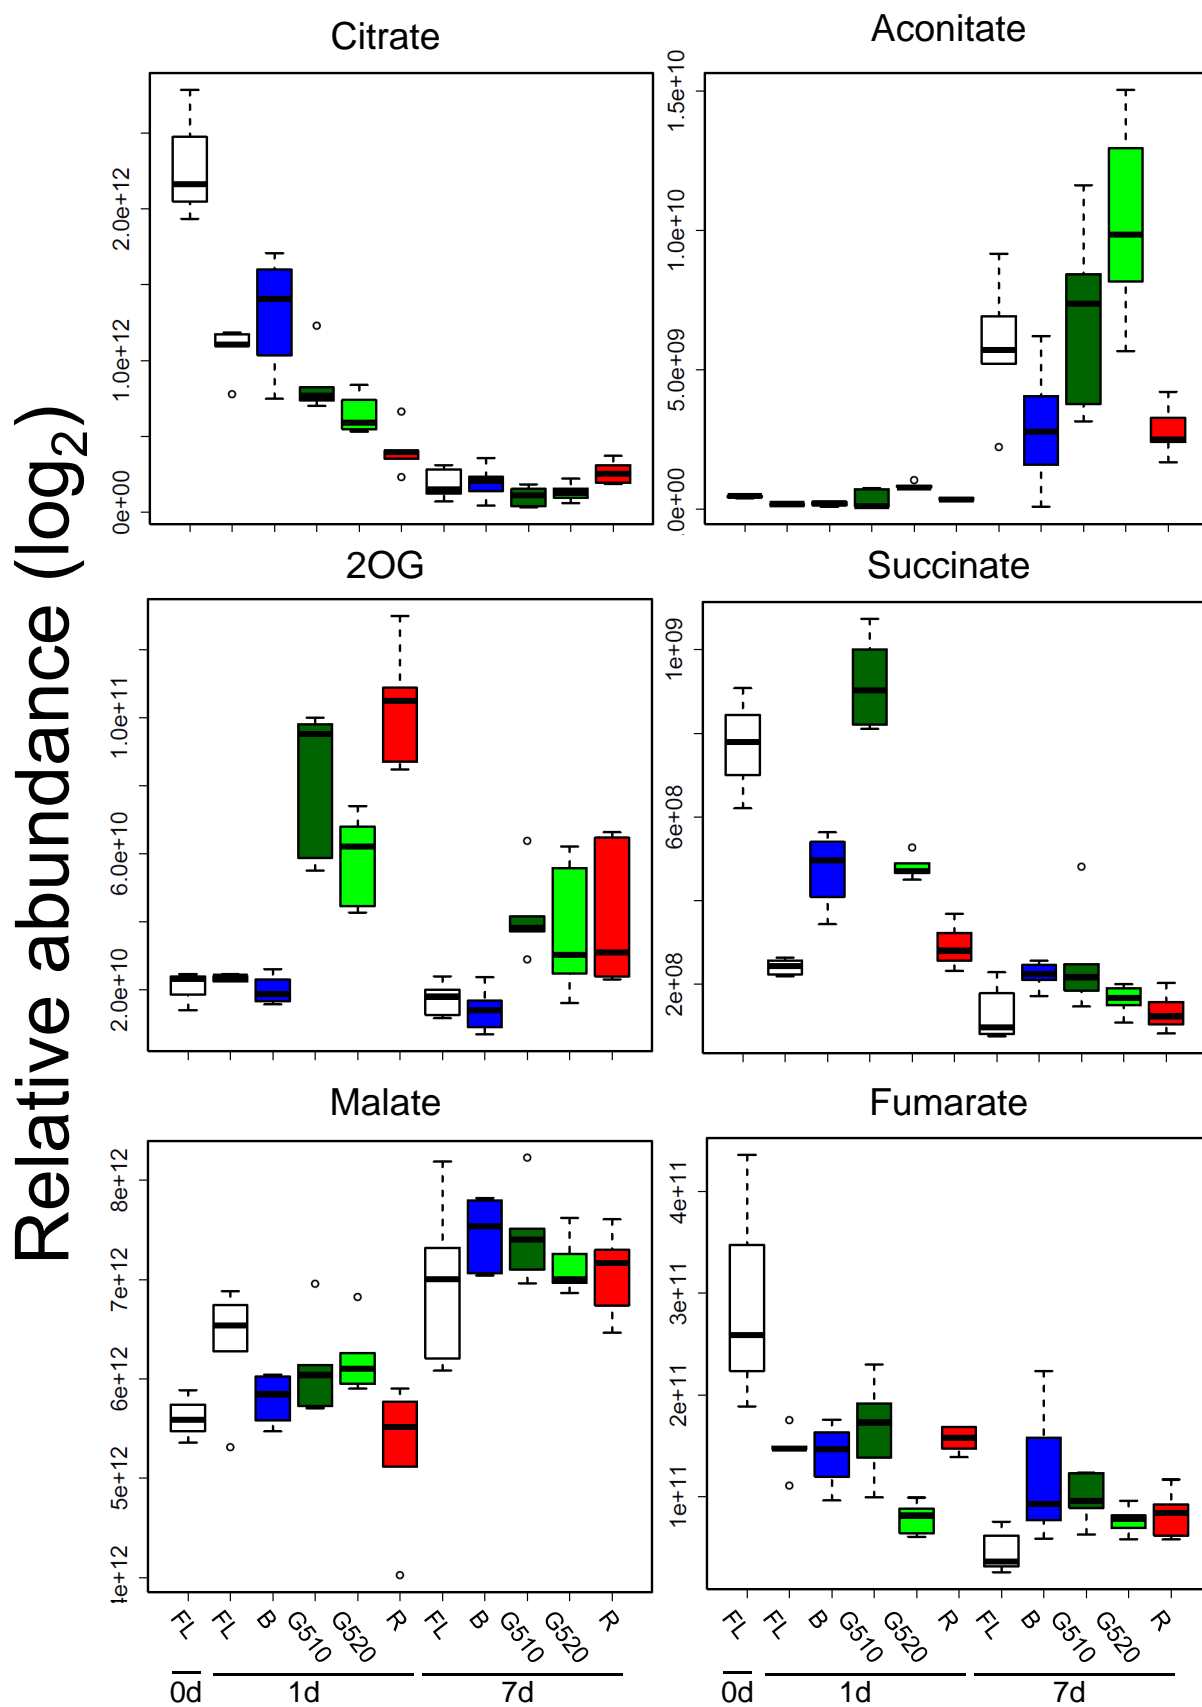

**Figure S2 (continued)**



**c** Gln, Glu, and Asp

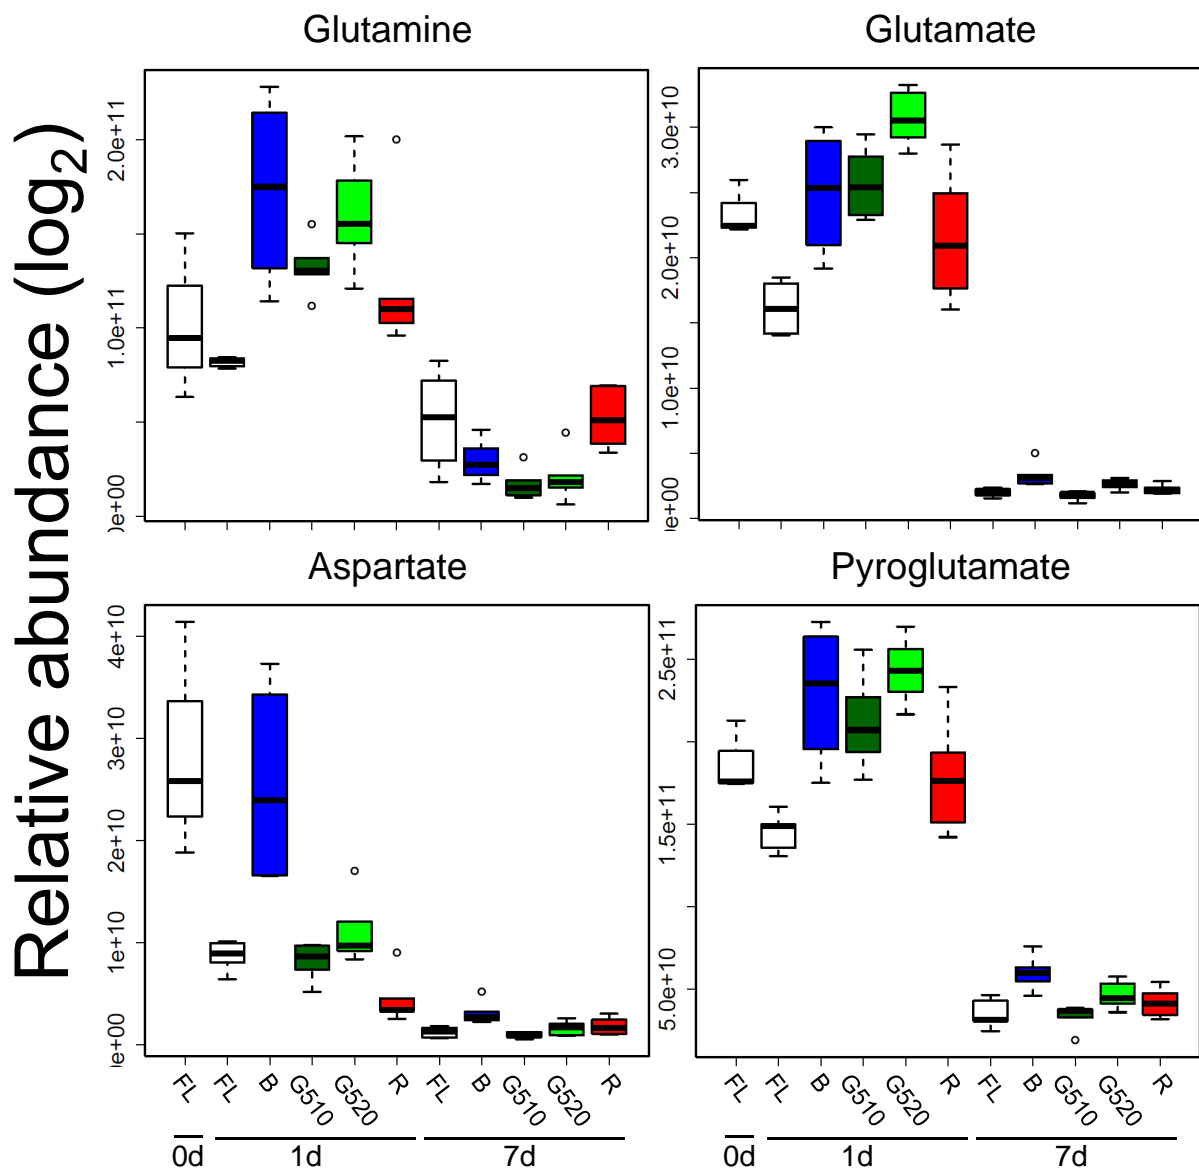

**Figure S2 (continued)**

**d** Stress related metabolites

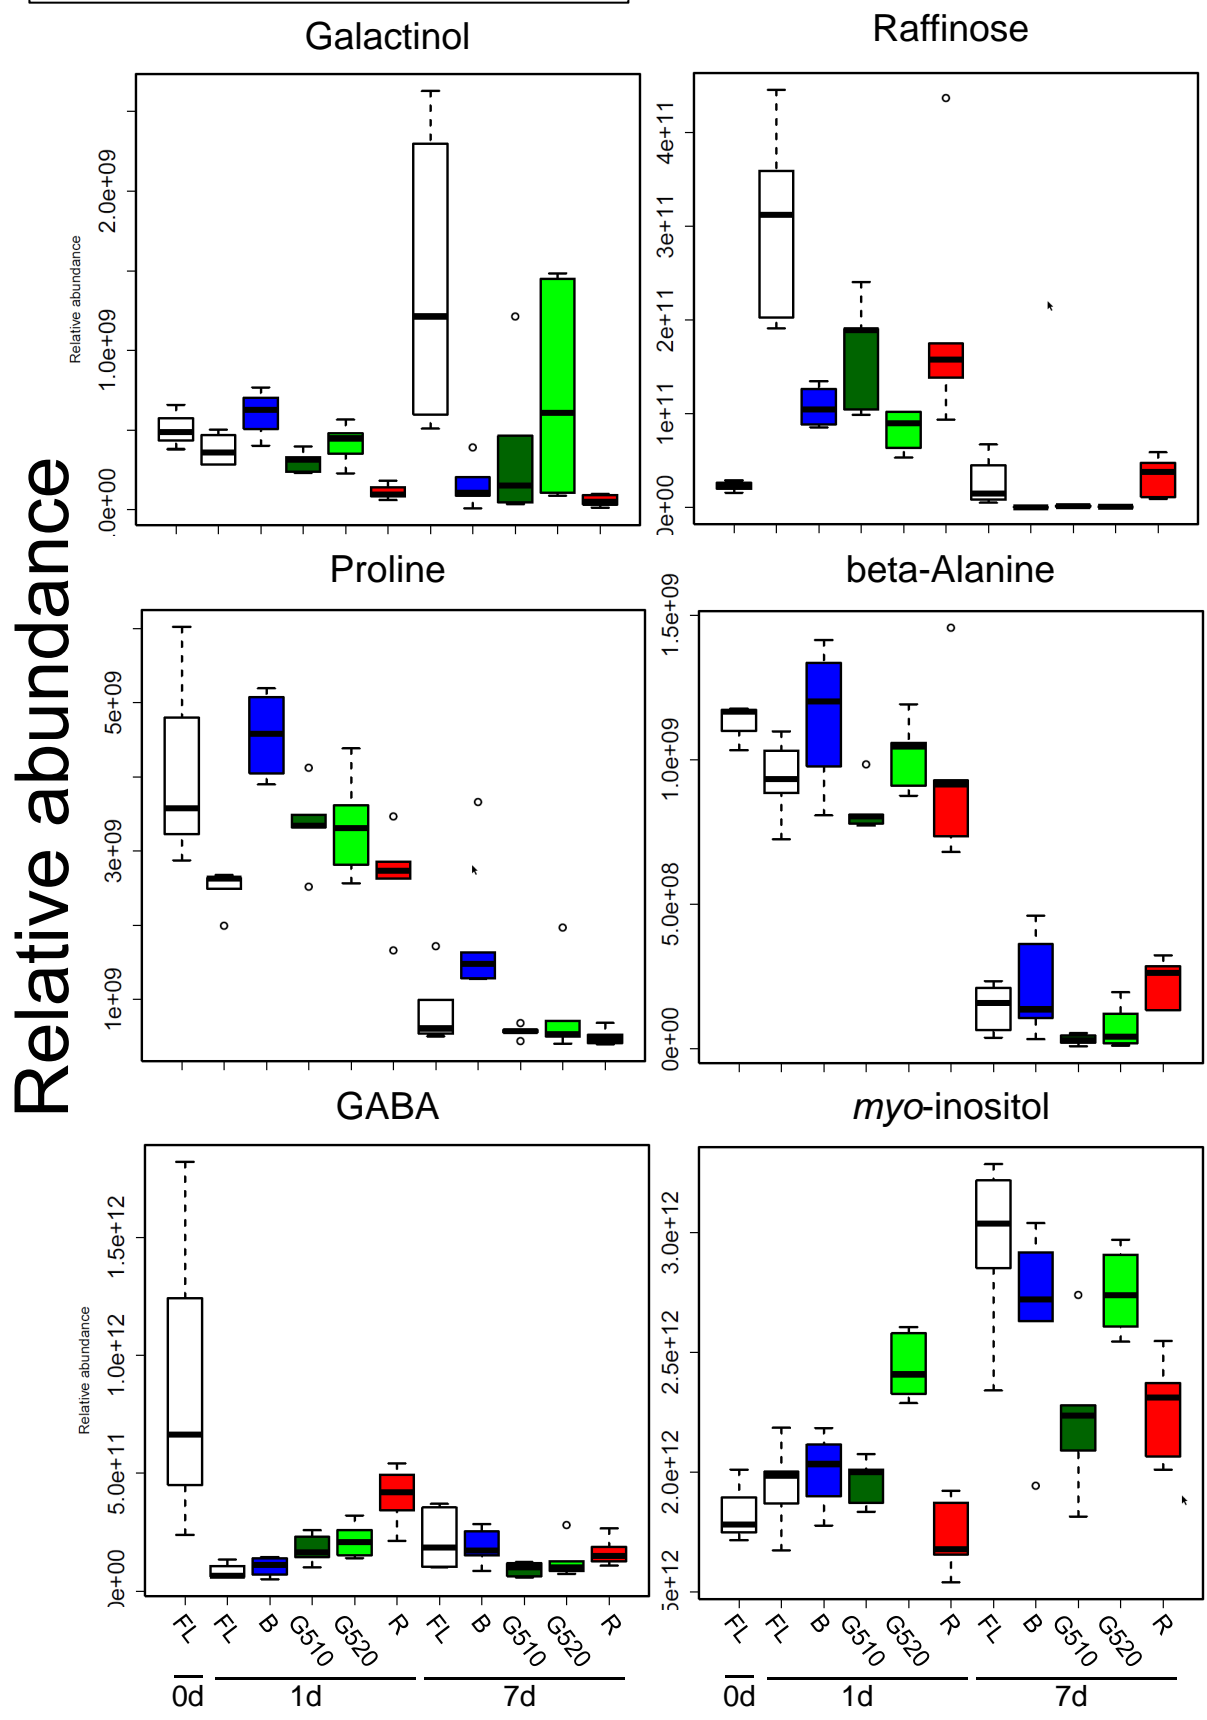

**Figure S2 (continued)**

**e** BCAAs and aromatic AAs

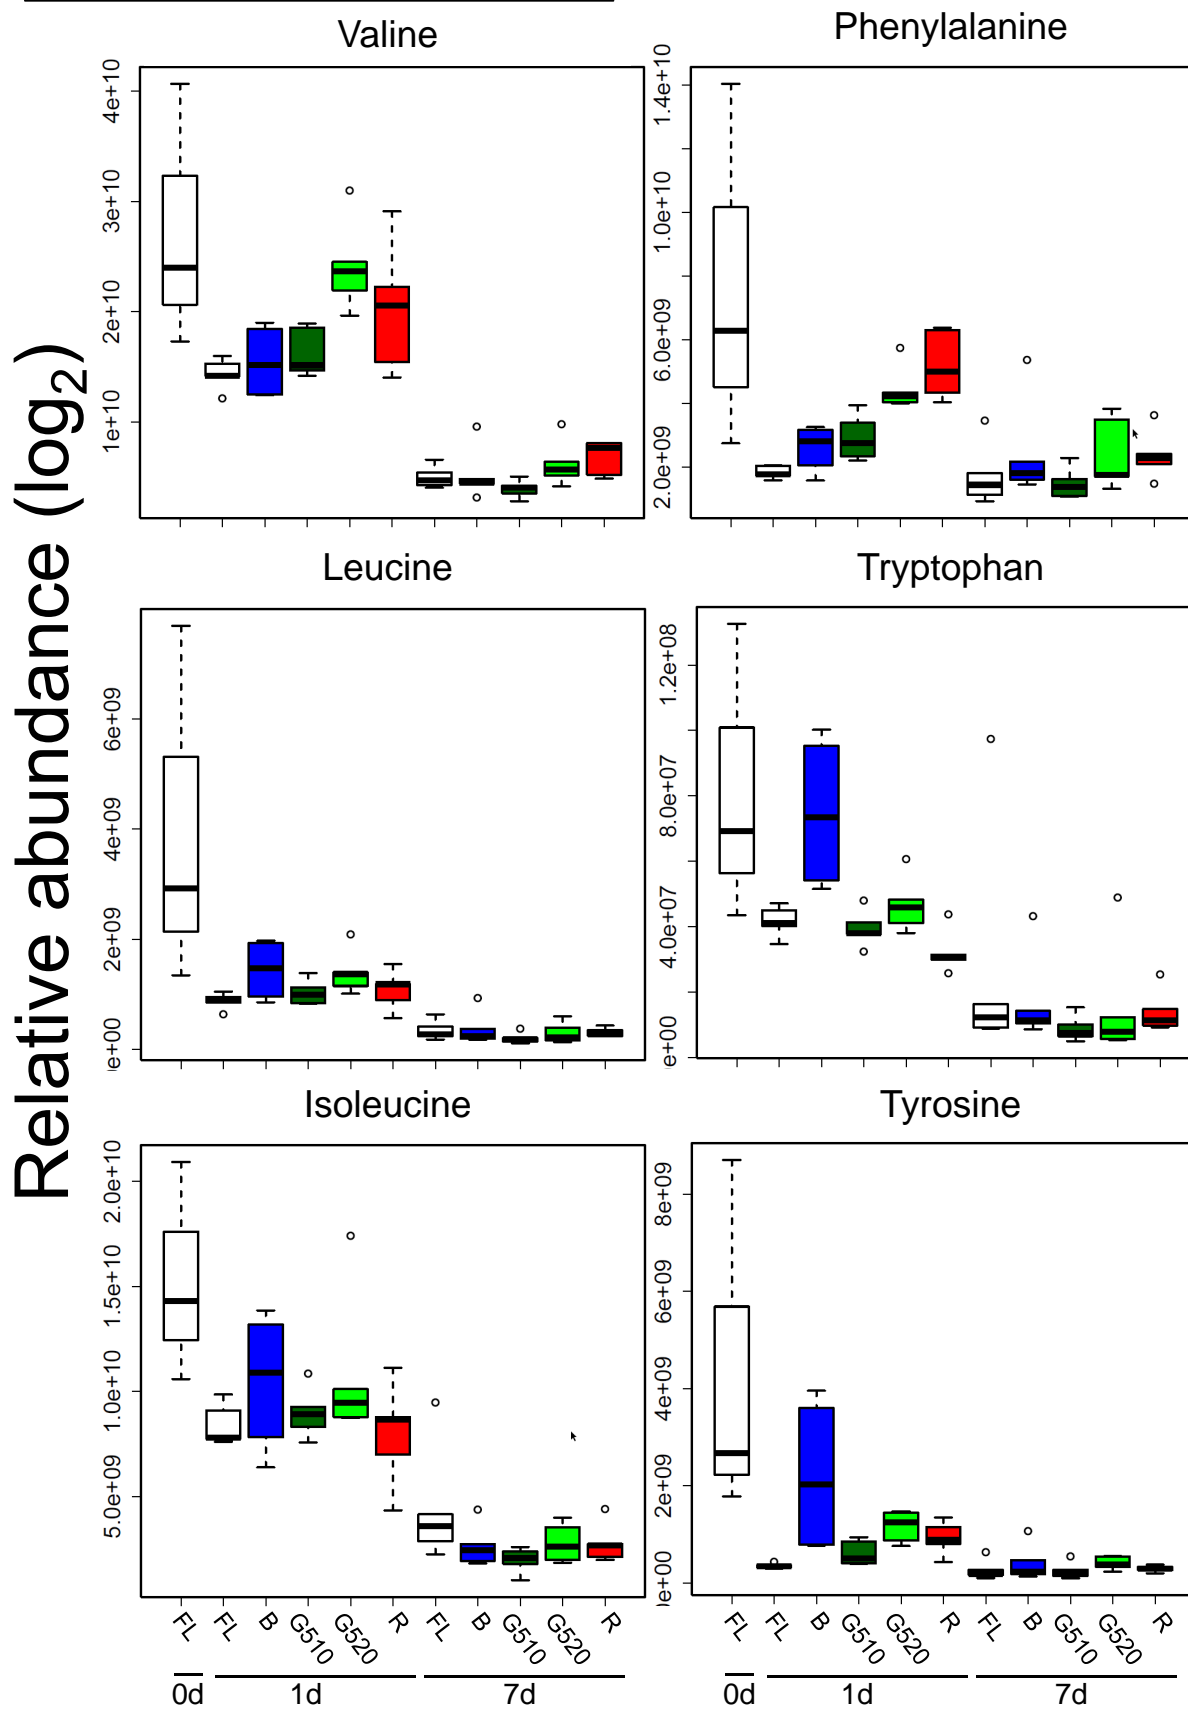

**Figure S2 (continued)**

**f** Ser/Gly and sulfur metabolism

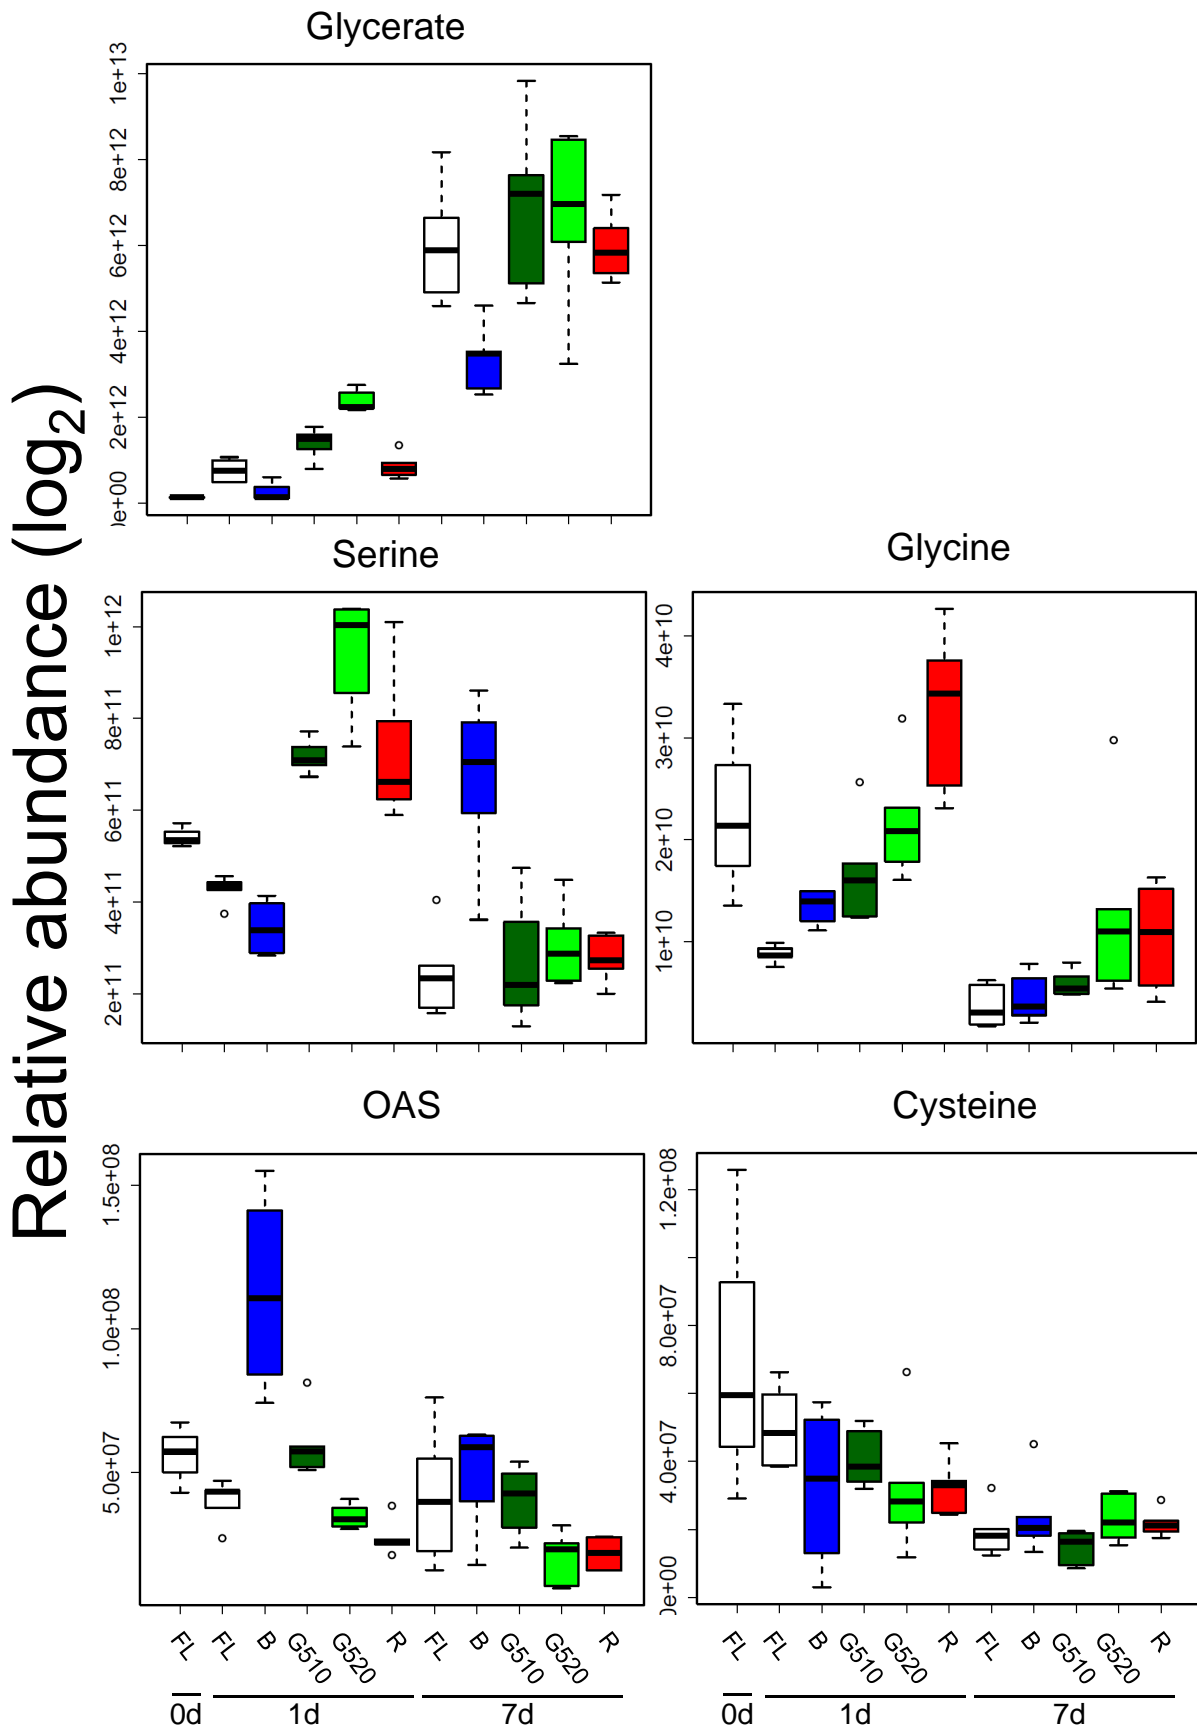

**Figure S2 (continued)**

**g****Chlorogenate and flavonoid metabolism**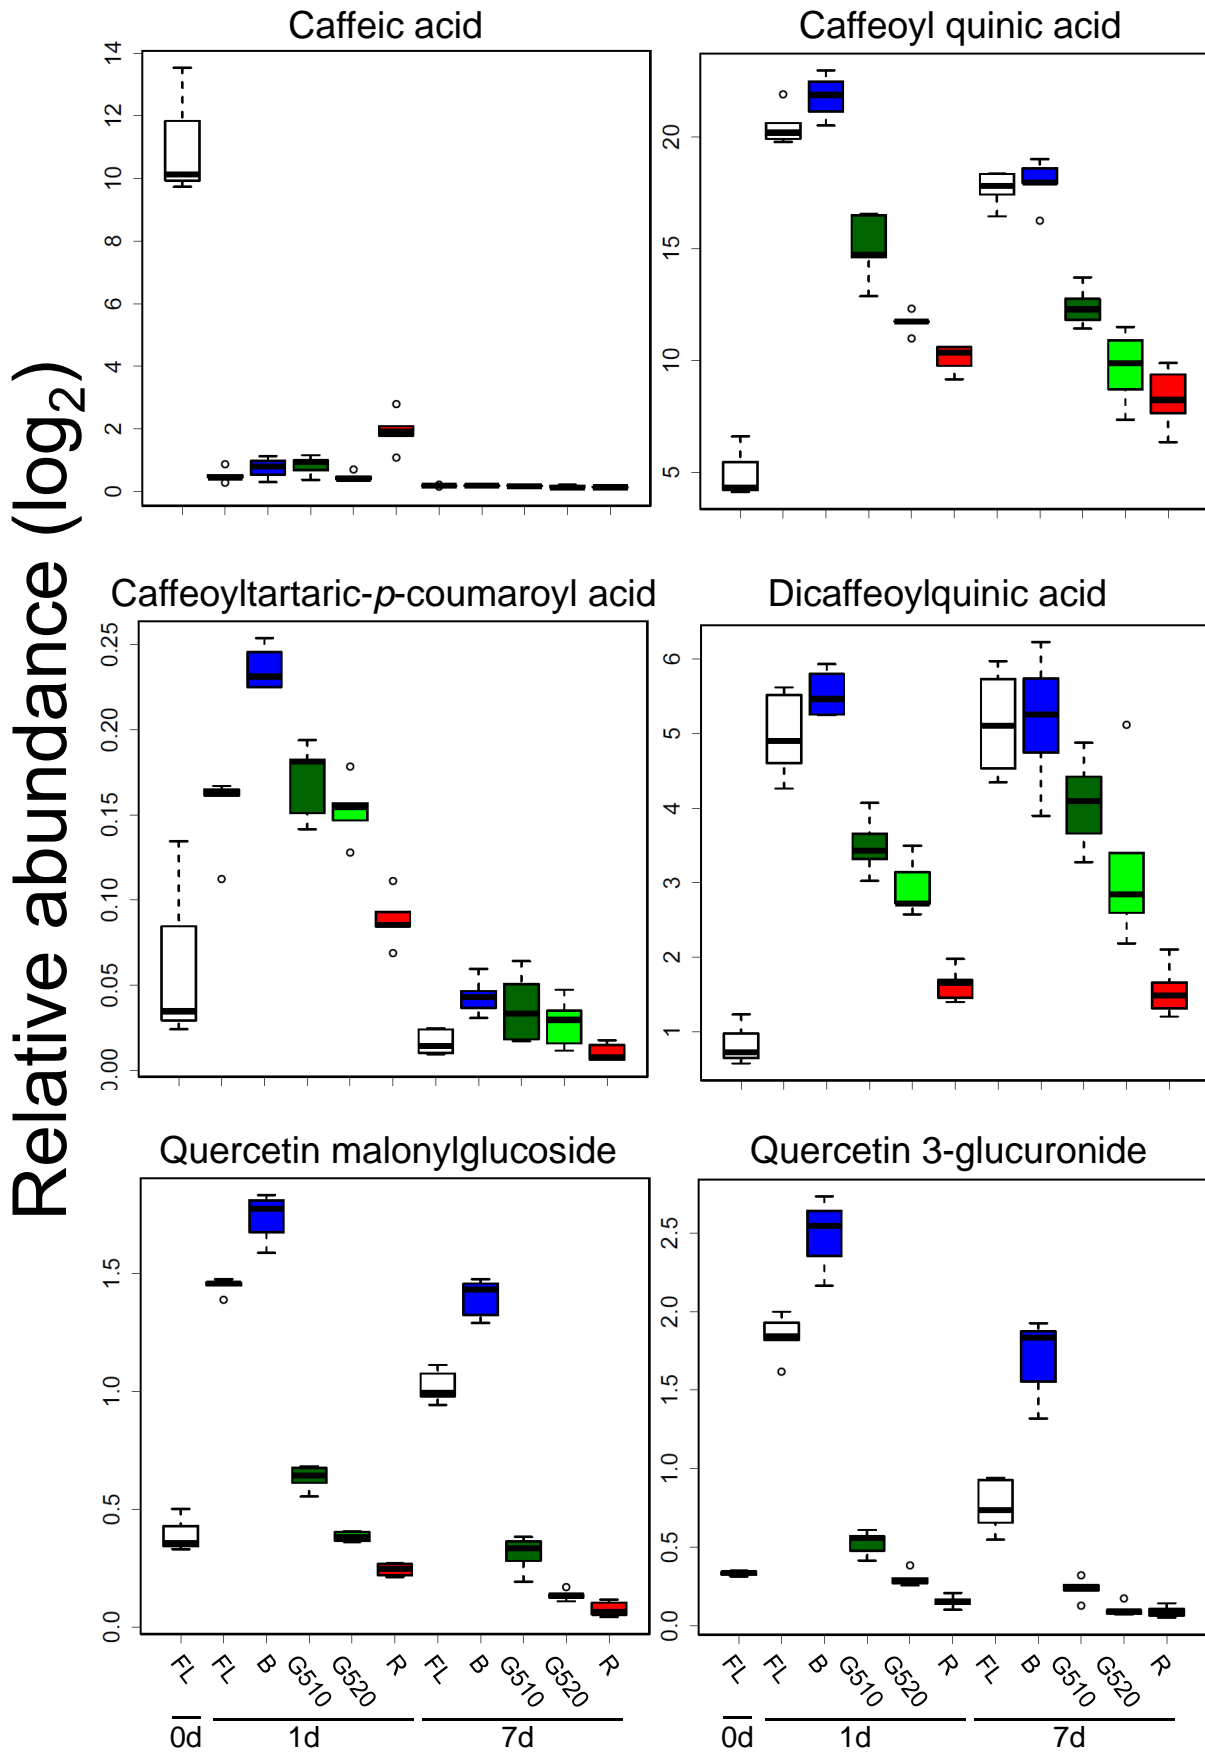**Figure S2 (continued)**

# h Carotenoids and chlorophylls

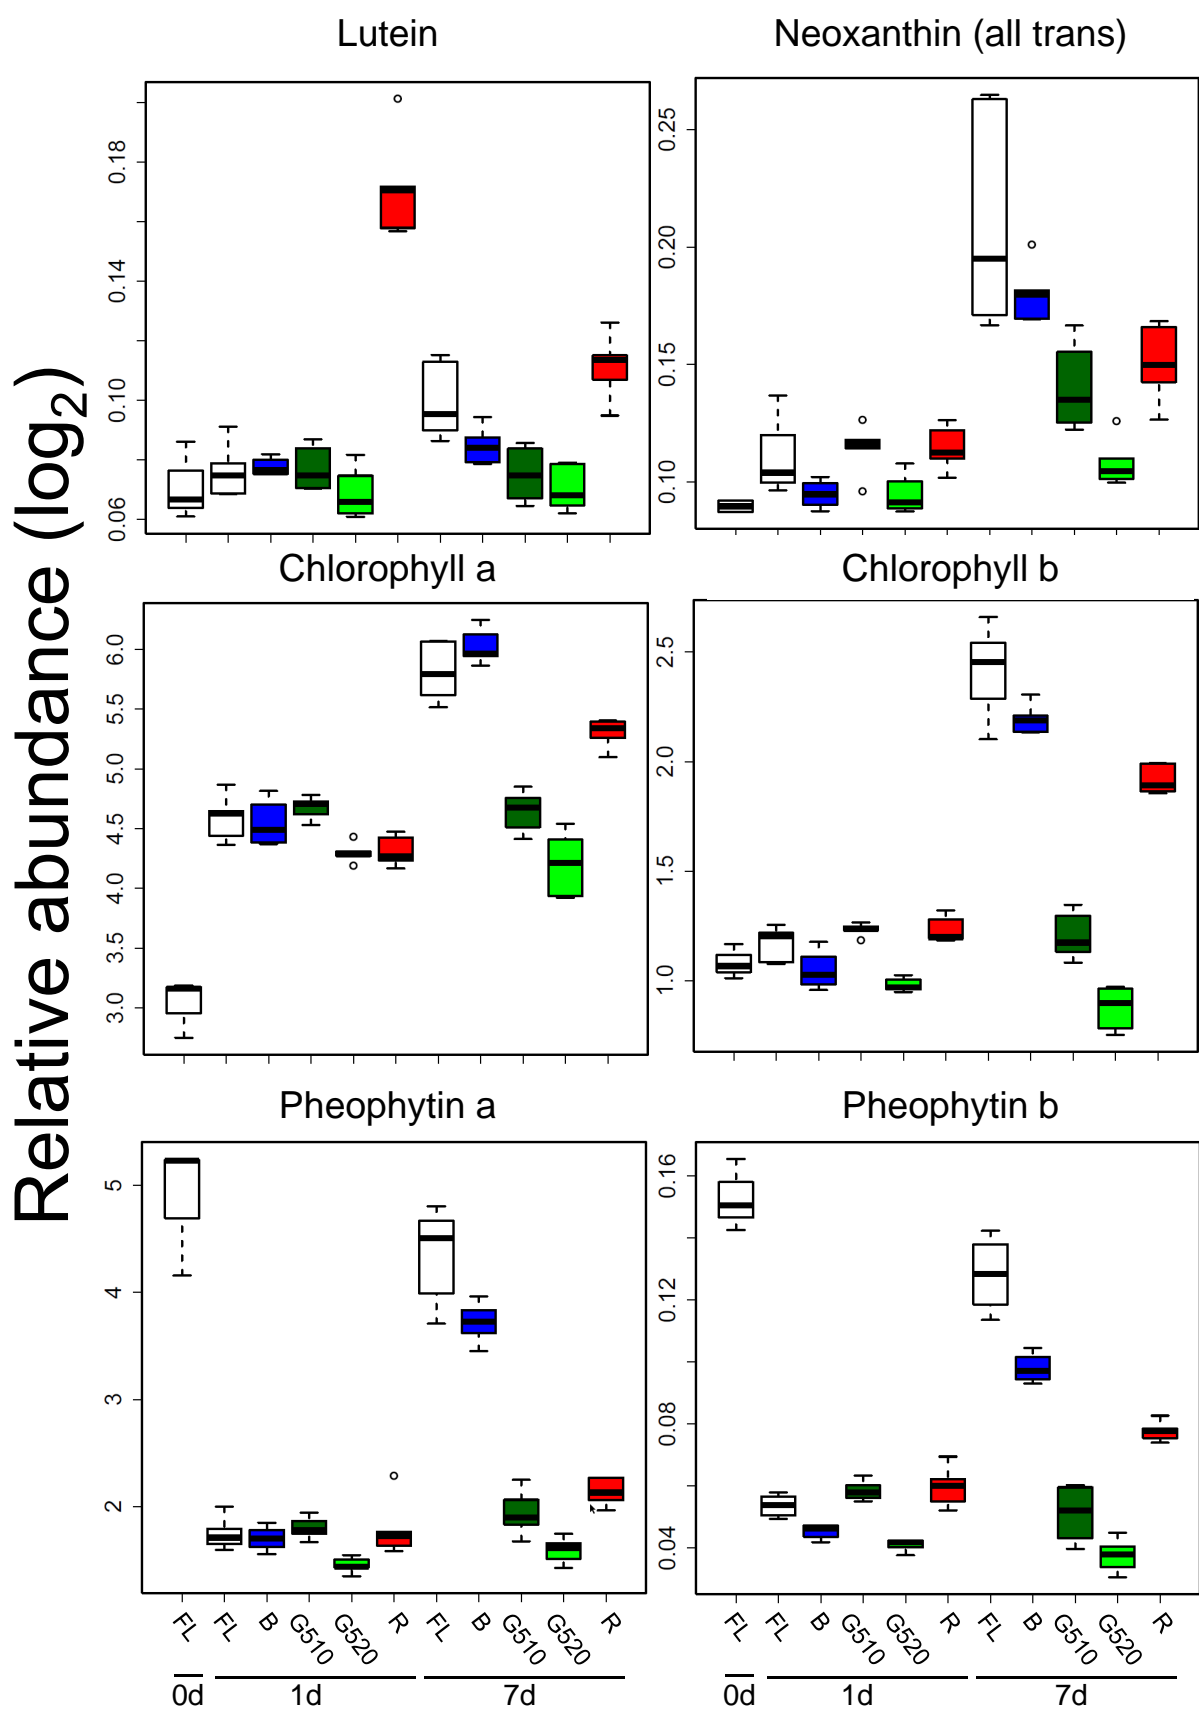

**Figure S2 (continued)**

**i** Sesquiterpene lactones

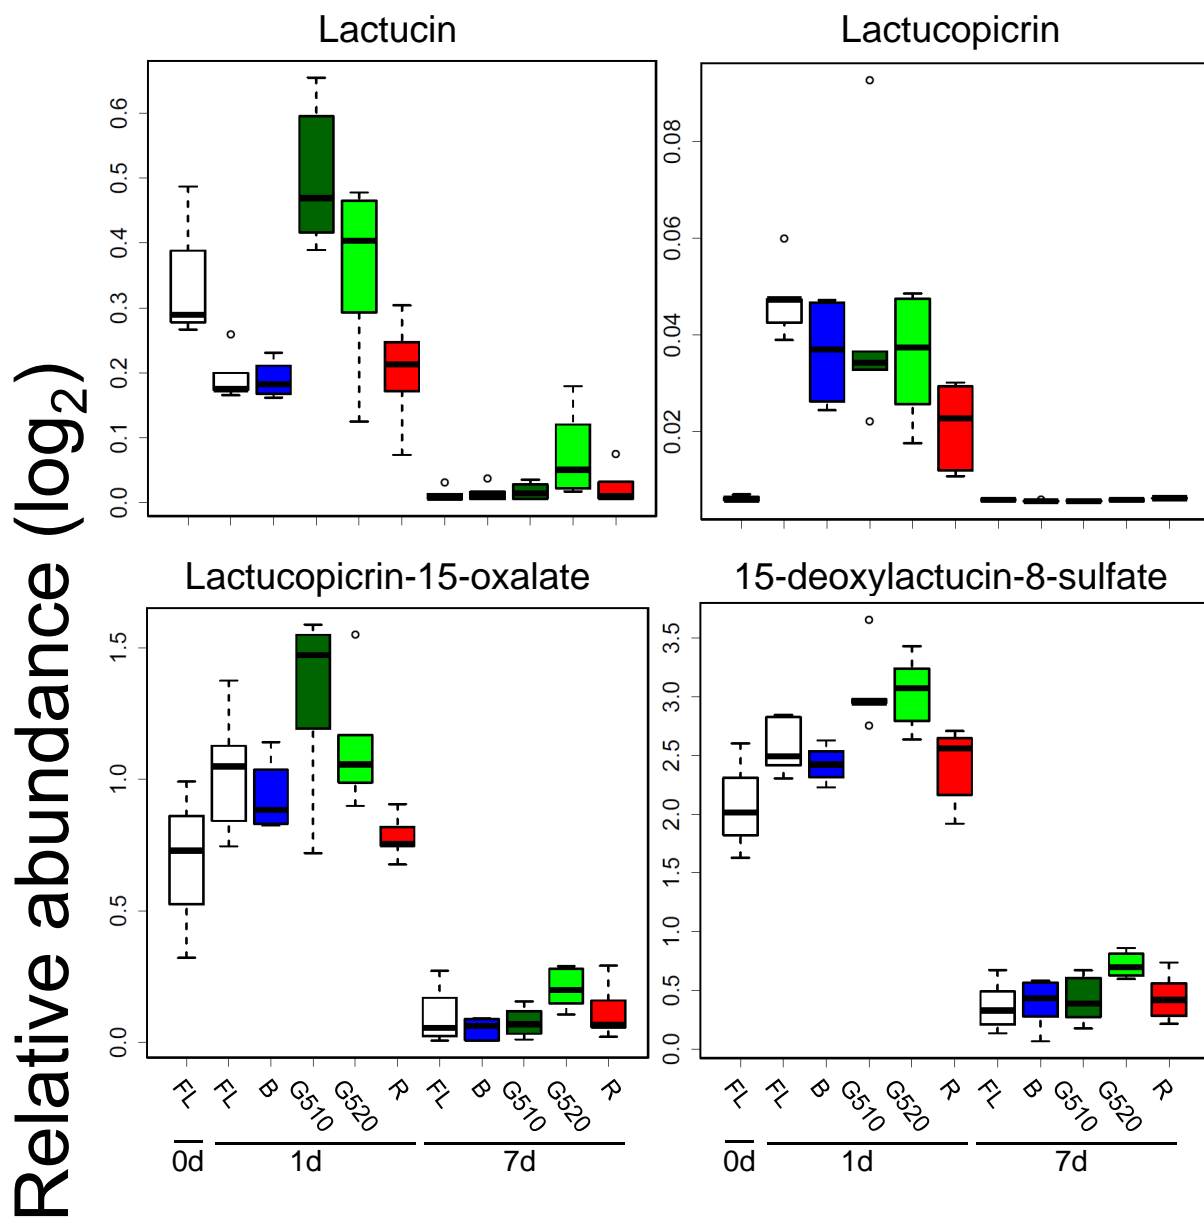

**Figure S2 (continued)**

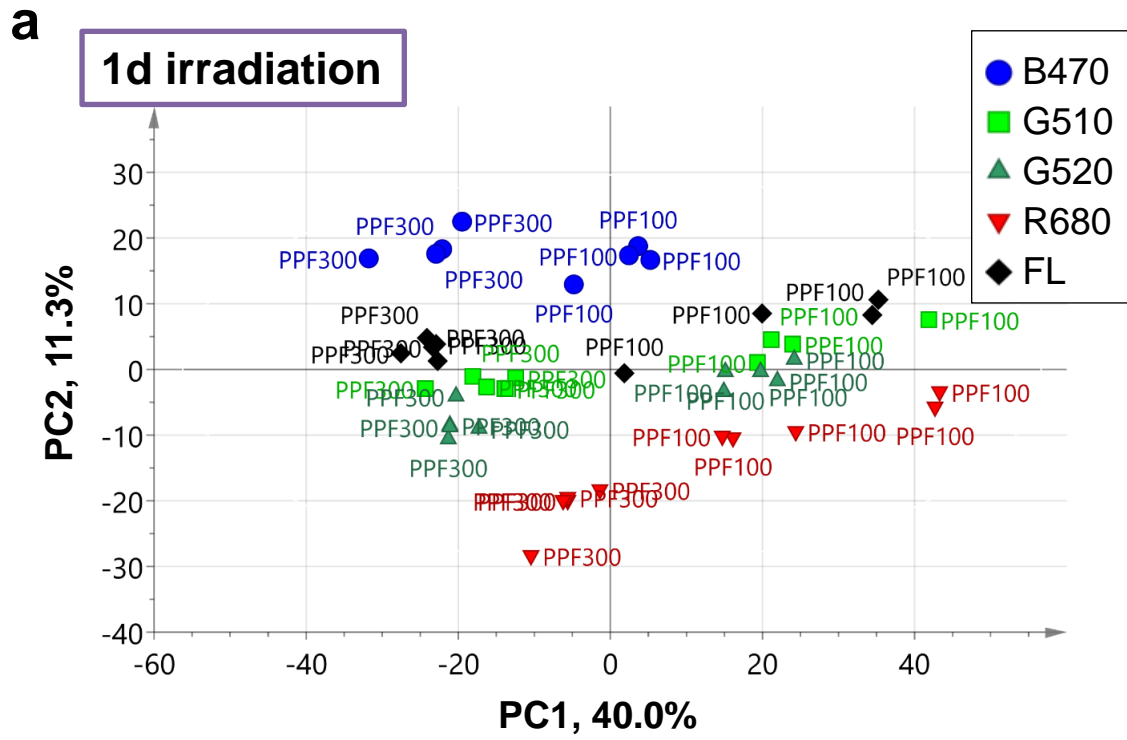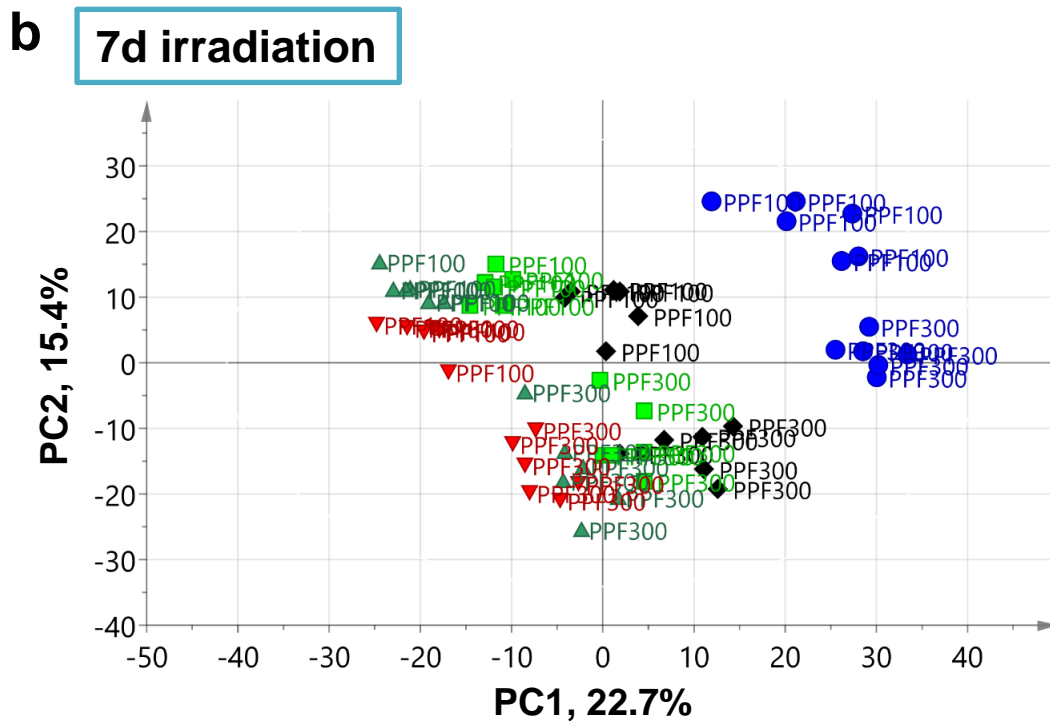

**Figure S3**



**a****P300 7 day****Increased metabolites**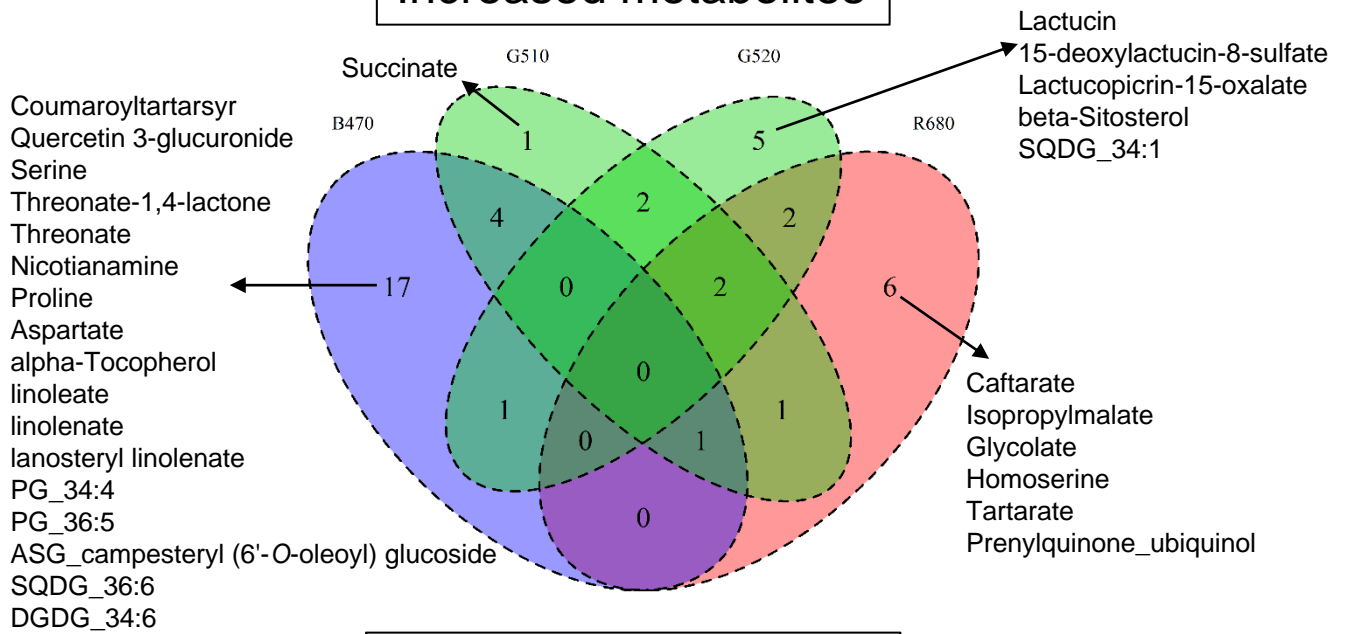**Decreased metabolites****b**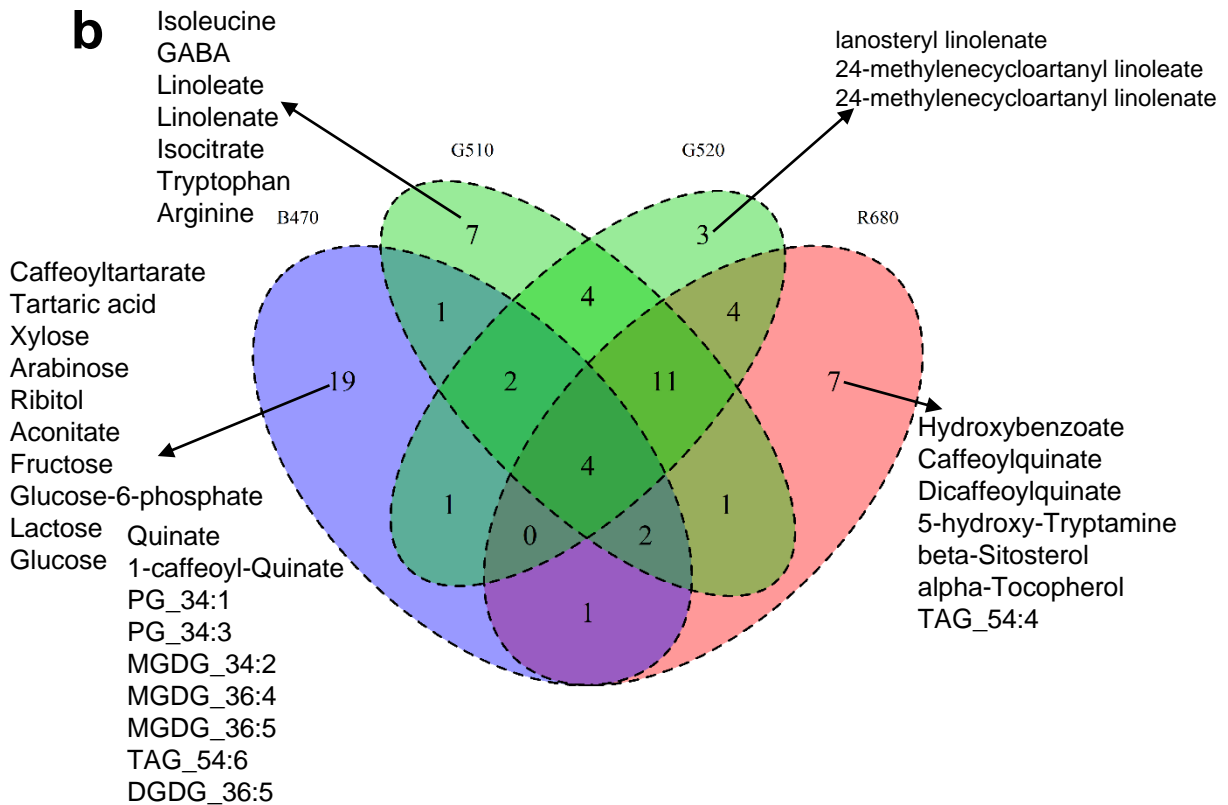**Figure S4**

| <b>RIKEN sample name</b> | <b>Total Raw Reads</b> | <b>Total Clean Reads</b> | <b>Total Clean Nucleotides (nt)</b> | <b>Q20%</b> | <b>N%</b> | <b>G+C%</b> |
|--------------------------|------------------------|--------------------------|-------------------------------------|-------------|-----------|-------------|
| P100 FL                  | 31,803,598             | 27,166,164               | 2,444,954,760                       | 94.74%      | 0.00%     | 46.13%      |
| P300 FL                  | 31,464,142             | 27,485,016               | 2,473,651,440                       | 94.74%      | 0.00%     | 45.97%      |
| P300 470nm               | 32,000,000             | 28,095,976               | 2,528,637,840                       | 94.68%      | 0.00%     | 46.17%      |
| P300 510nm               | 31,823,538             | 27,344,692               | 2,461,022,280                       | 94.79%      | 0.00%     | 45.56%      |
| P300 520nm               | 29,982,232             | 25,952,786               | 2,335,750,740                       | 94.65%      | 0.00%     | 46.53%      |
| P270 680nm               | 29,646,750             | 25,690,178               | 2,312,116,020                       | 94.80%      | 0.00%     | 46.41%      |

**Figure S5**

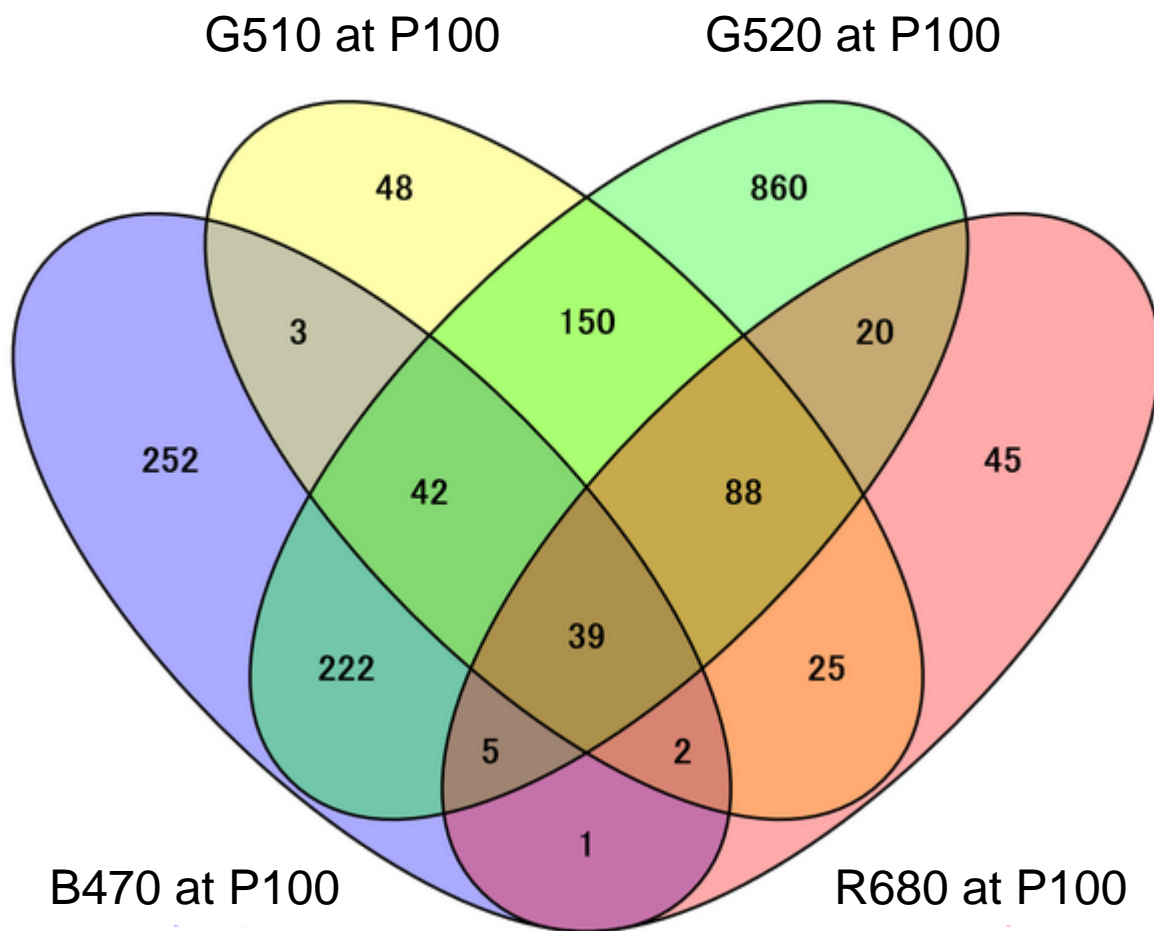

**Figure S6**

# B470 vs. G510 [FL P100]

## Intracellular organelle cellular process

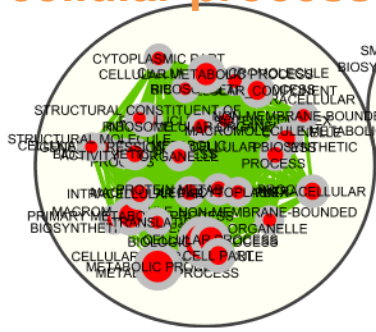

## Photosystem reaction center

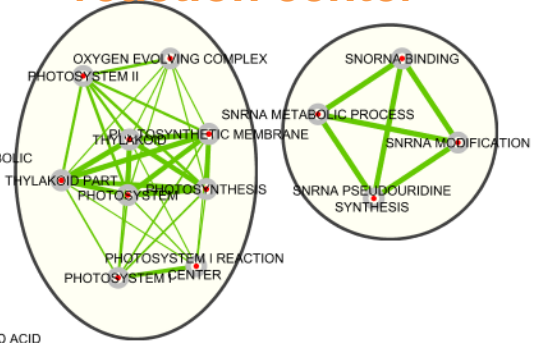

## Catabolic process acid amino

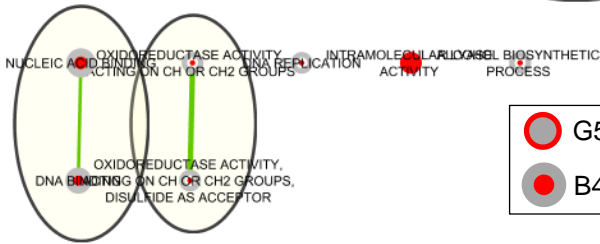

- G510-specific term
- Link in G510 vs. FL (P100)
- B470-specific term
- Link in B470 vs. FL (P100)

**Figure S7**



# R680 vs. G520 [FL P300]

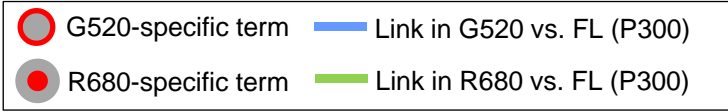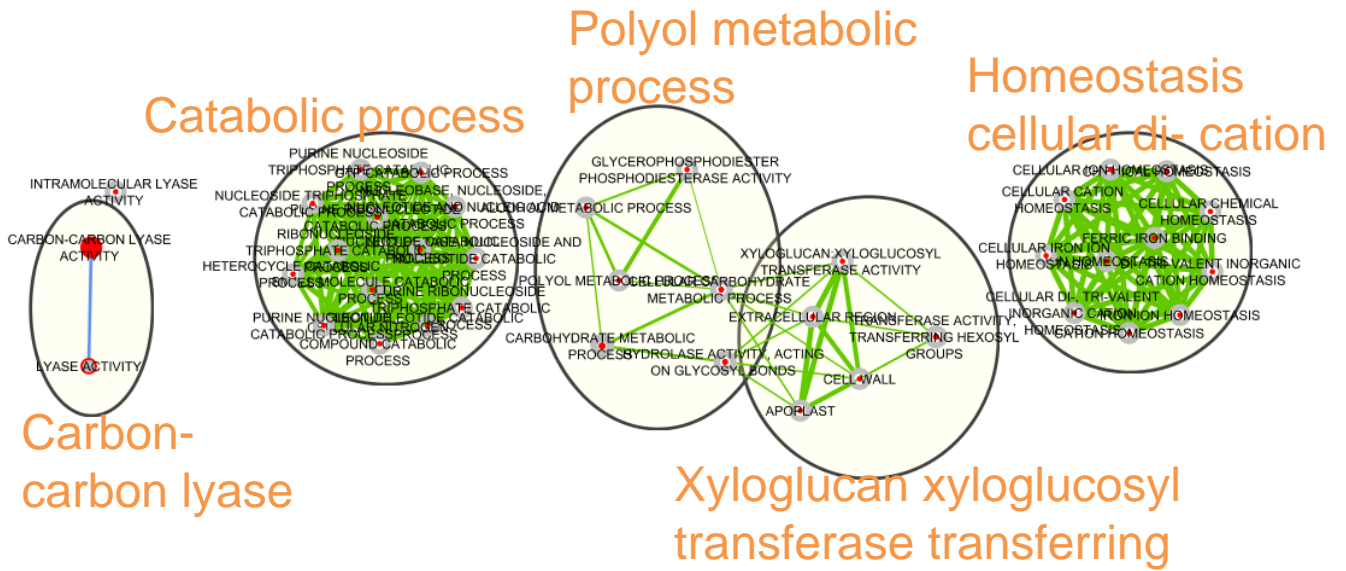

**Figure S9**

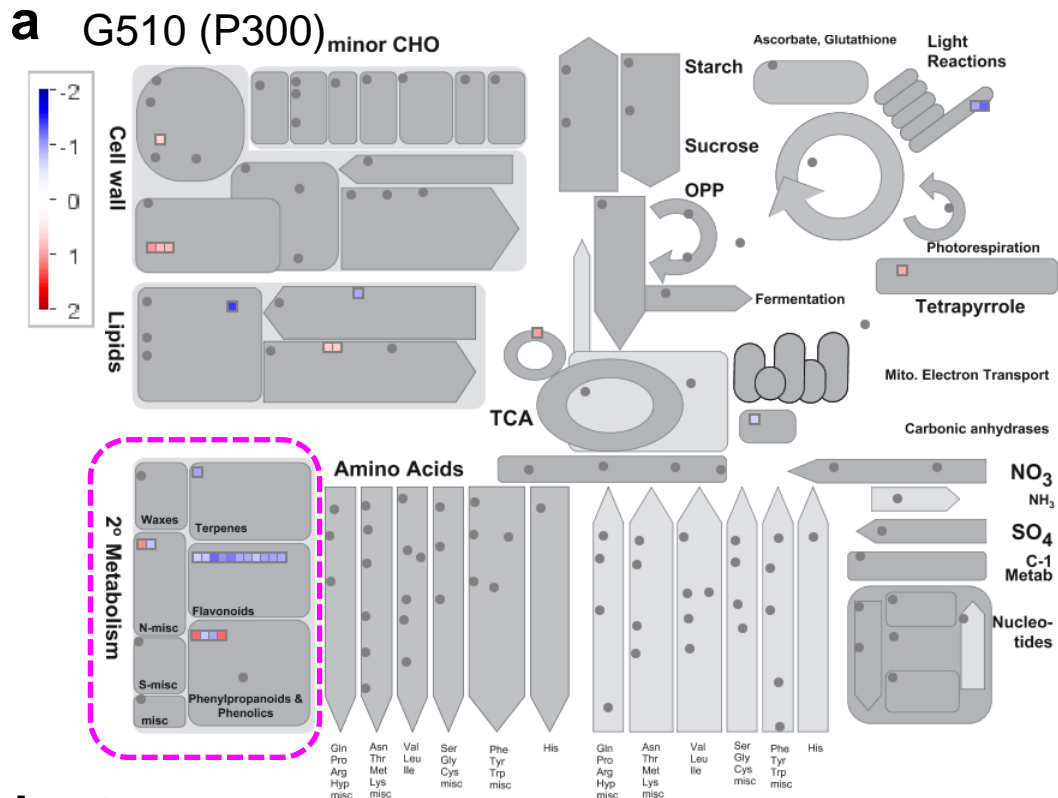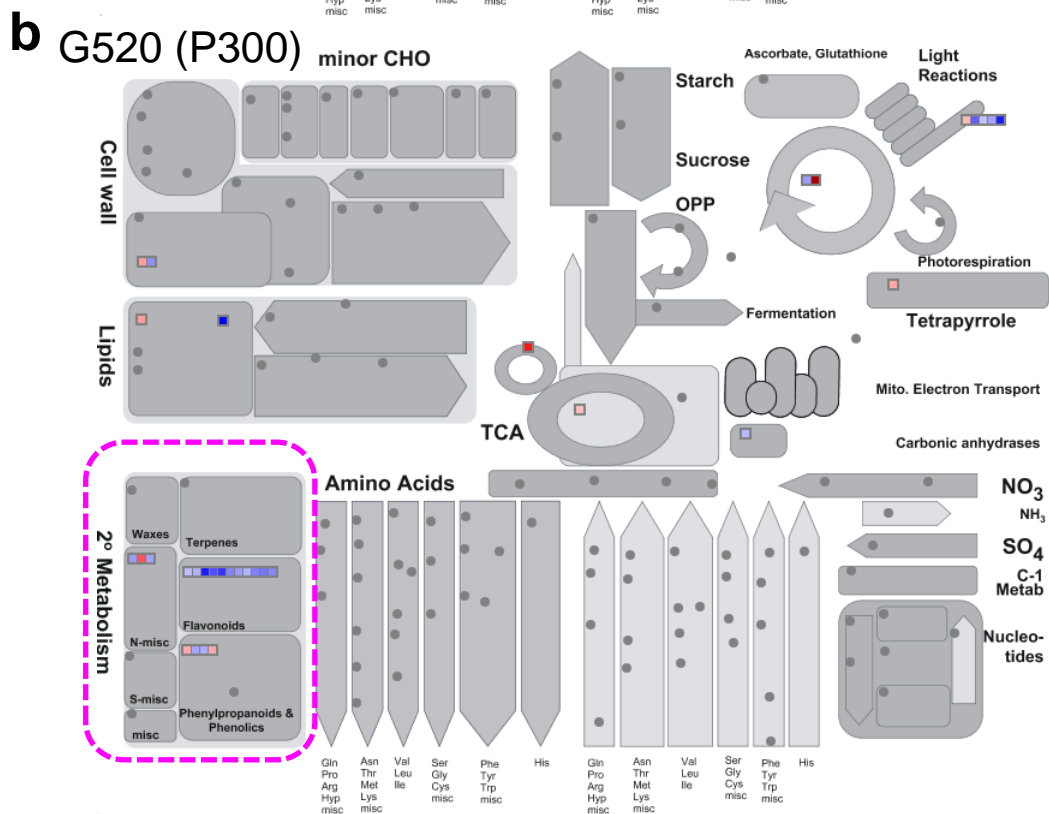

**Figure S10**

# qRT-PCR, P300

\*  $p < 0.05$

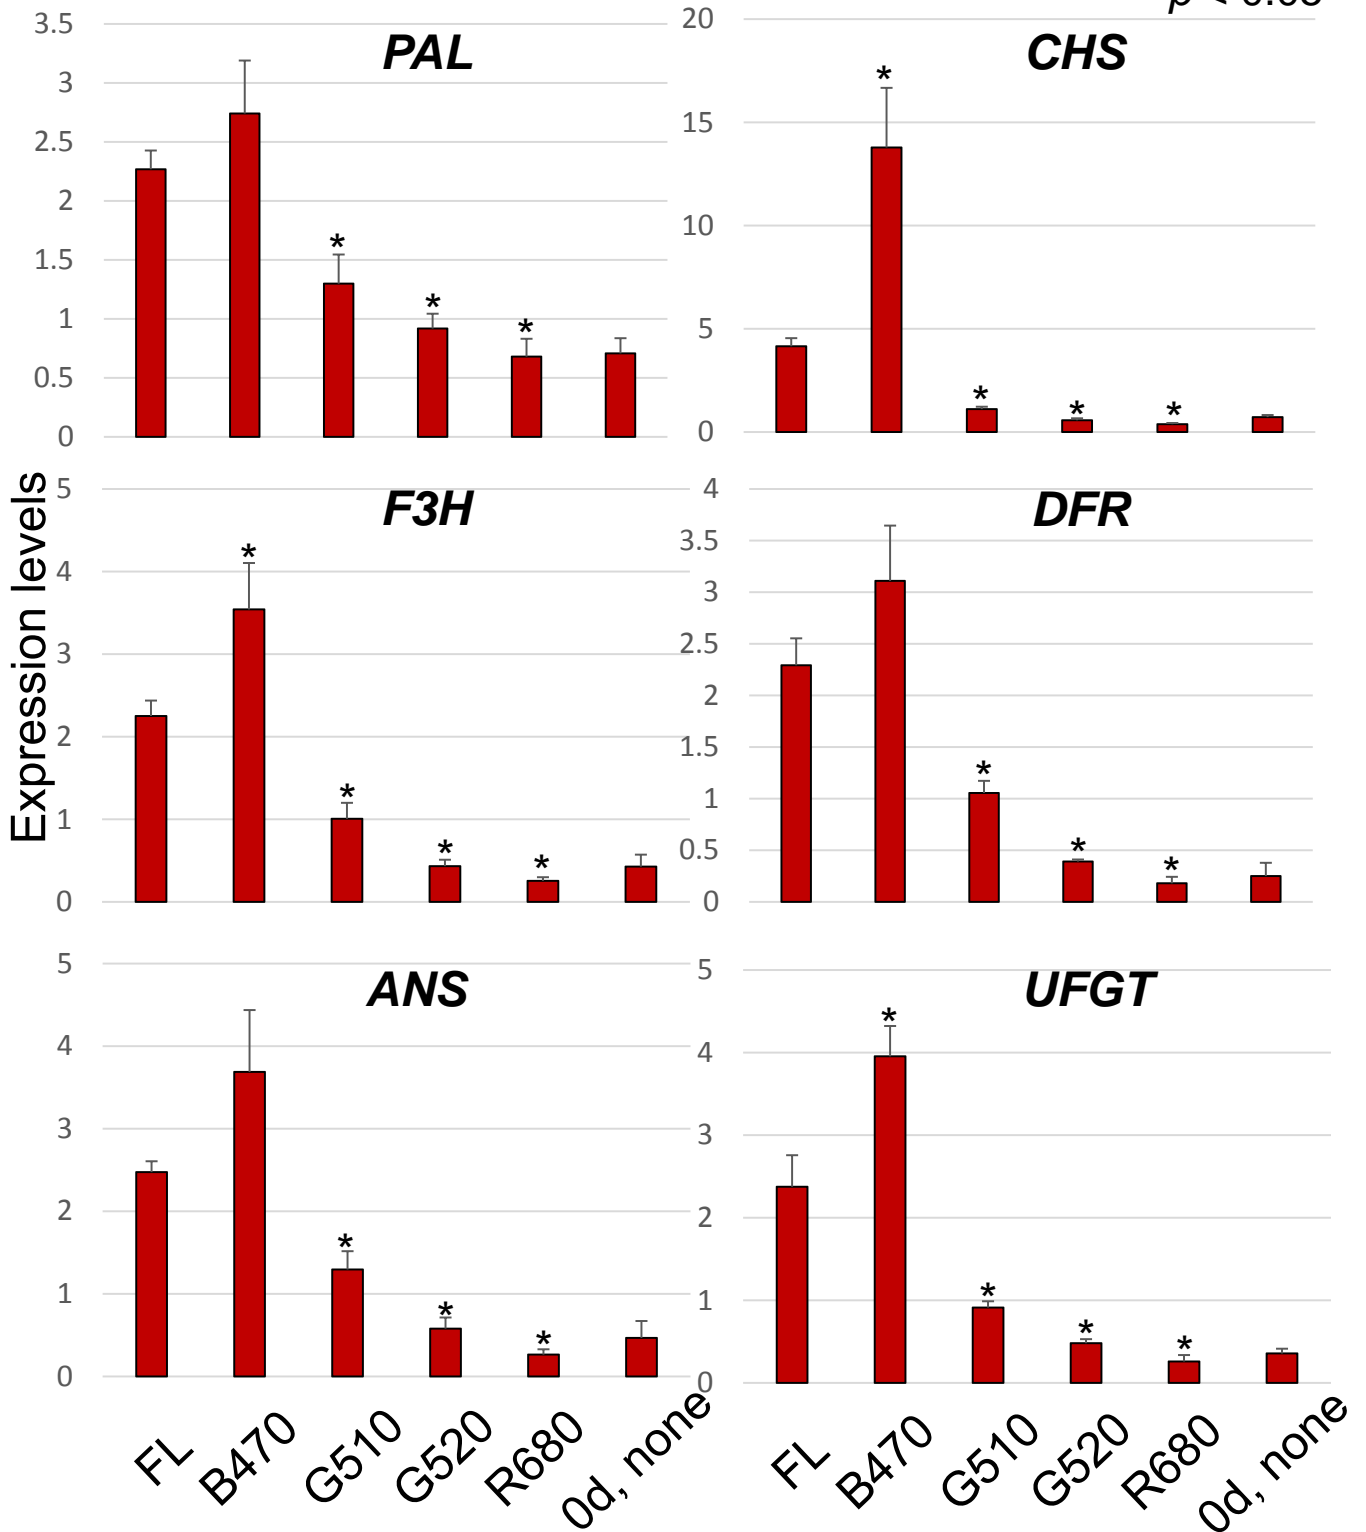

**Figure S11**



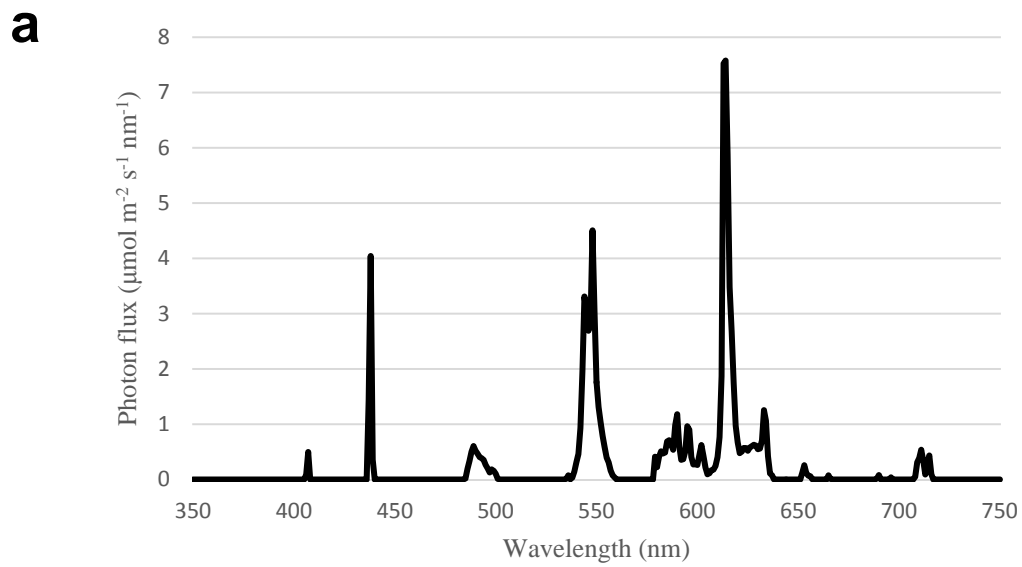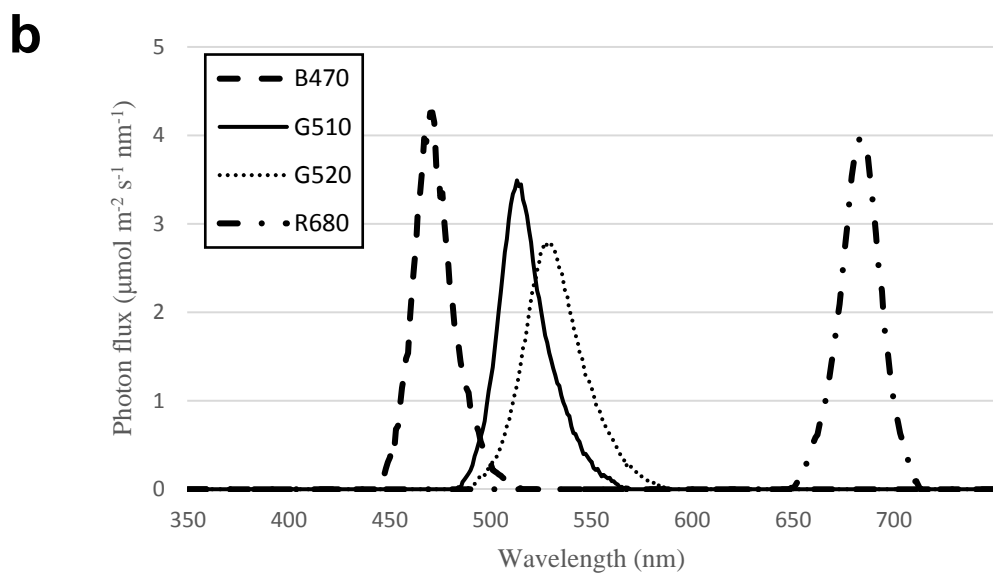

**Figure S12**

# Supplementary Document S1. Metabolomics Metadata

## 1. Plant context metadata

### 1.1. Plant materials

#### 1.1.1. BioSource Species

*Lactuca sativa* L.

#### 1.1.2. Genotypes/Varieties

cv. Banchu Red Fire

#### 1.1.3. Organ specification

The third leaf

#### 1.1.4. Growth conditions

Under white fluorescent light (FL, FLR110H-W1A; Mitsubishi/Osram Co.; Yokohama, Japan), seeds of red-leaf lettuce (*Lactuca sativa* L. cv Banchu red fire; Takii seed, Kyoto, Japan) were pre-germinated [14 hr, 14 days,  $23 \pm 2^\circ\text{C}$ ,  $100 \mu\text{mol m}^{-2} \text{s}^{-1}$  photon synthetic photon flux density (PPFD)]. The seedlings were supplied with a nutrient solution (Otsuka hydroponic composition, Otsuka Chemical Co. Ltd., Osaka, Japan) adjusted to an electrical conductivity (EC) of 1.2 dS/m and pH 5.8. It contained  $7.0 \text{ mmol l}^{-1} \text{NO}_3^-$ ,  $0.6 \text{ mmol l}^{-1} \text{NH}_4^+$ ,  $3.7 \text{ mmol l}^{-1} \text{K}^+$ ,  $2.3 \text{ mmol l}^{-1} \text{Ca}^{2+}$ ,  $1.3 \text{ mmol l}^{-1} \text{H}_2\text{PO}_4^-$ , and  $0.9 \text{ mmol l}^{-1} \text{Mg}^{2+}$ . The seedlings were transplanted to cultivation panels in a growth chamber (VB1514; Vötsch, Germany), supplied with nutrient solution for the duration of the experiments, and grown at  $25^\circ\text{C}$  [relative humidity (RH) 60%,  $900 \mu\text{mol mol}^{-1} \text{CO}_2$ ]. The plants were irradiated with different light spectra from LEDs, namely B470 (peak wavelength 470 nm, ISL-305X302-BBBB, CCS Co., Kyoto, Japan), G510 (peak wavelength 510 nm, ISL-305X302-GGGG505, CCS Co.), G520 (peak wavelength of 524 nm; ISL-305X302-GGGG525, CCS) and R680 (peak wavelength of 680nm; ISL-305X302-RRRR68, CCS Co., Kyoto, Japan) (Figure S9). The seedlings were irradiated for 24 hr at PPFD 100 or  $300 \mu\text{mol m}^{-2} \text{s}^{-1}$  (P100, P300). The wavelength of the light source was determined with a USB2000 spectrometer (Ocean Optics, Dunedin, FL, USA) (Figure 1). At 14, 15 and 21 DAS, dry weight (DW) was measured.

## 2. Chemical analysis metadata

## **Chemicals**

All the chemicals and reagents that were used for this study were of spectrometric grade. Chemicals excluding isotope reference compounds and reagents for silylation were purchased from Sigma Aldrich (Tokyo, Japan), NacalaiTesque (Kyoto, Japan), or Wako Pure Chemical Industries (Osaka, Japan). The 6 stable isotope compounds ( $[^{13}\text{C}_5]$ -proline,  $[^2\text{H}_4]$ -succinic acid,  $[^2\text{H}_6]$ -2-hydroxybenzoic acid,  $[^{13}\text{C}_3]$ -myristic acid,  $[^{13}\text{C}_{12}]$ -sucrose, and  $[^2\text{H}_7]$ -cholesterol) were purchased from Cambridge Isotope Laboratories (Andover, MA, USA);  $[^{13}\text{C}_5,^{15}\text{N}]$ -glutamic acid and  $[^{13}\text{C}_6]$ -glucose from Spectra Stable Isotopes (Columbia, Maryland, USA),  $[^2\text{H}_4]$ -1,4-diaminobutane was from C/D/N ISOTOPES (Pointe-Claire, Quebec, Canada), and  $[^{13}\text{C}_4]$ -hexadecanoic acid from Icon (Mt. Marion, NY, USA). The reagent for trimethylsilylation, *N*-methyl-*N*-trimethylsilyltrifluoroacetamide (MSTFA) was purchased from Tokyo Chemical Industry (Tokyo, Japan).

### **2.1. Sample processing and extraction**

#### **2.1.1. Extraction and derivatization for GC-TOF-MS**

Each frozen sample with a 5-mm zirconia bead was extracted with 400 fold amount of solvent (methanol/chloroform/water [3:1:1 v/v/v]) containing 10 stable isotope reference compounds at 4°C in a mixer mill (MM301; Retsch, Haan, Germany) at a frequency of 15 Hz. Each isotope compound was adjusted to a final concentration of 15 ng per 1- $\mu\text{l}$  injection volume. After 5-min centrifugation at 15,100  $\times$  g, a 200- $\mu\text{l}$  aliquot of the supernatant was transferred to a glass insert vial. The extracts were evaporated to dryness in an SPD2010 SpeedVac® concentrator (Thermo Fisher, Scientific, Waltham, MA, USA). We used extracts from 0.5-mg DW samples for derivatization, i.e., methoxymation and silylation. For methoxymation, 30  $\mu\text{l}$  of methoxyamine hydrochloride (20 mg/ml in pyridine) were added to the sample. After 22.5 h of derivatization at room temperature the sample was trimethylsilylated for 1 h using 30  $\mu\text{l}$  of MSTFA at 37°C with shaking. All derivatization steps were performed in a vacuum glove box VSC-1000 (Sanplatec, Osaka, Japan) filled with 99.9995% (G3 grade) dry nitrogen.

#### **2.1.2. Extraction for LC-q-TOF-MS to detect secondary metabolites**

Each frozen sample was extracted with 5 fold amount of solvent (methanol/water [8:2 v/v]) containing a reference compound (2.5  $\mu\text{M}$  of 10-camphorsulfonic acid ( $[\text{M}-\text{H}]^-$ ,  $m/z$  231.0691)) using

a mixer mill MM301 (Retsch) at a frequency of 18 Hz for 7 min at 4°C. After centrifugation for 10 min at 17,000 × g, the supernatant was filtered using an Oasis® HLB μElution plate (30 μm, Waters Co., Massachusetts, US).

### **2.1.3. Extraction for LC-q-TOF-MS to detect lipids**

Each frozen sample was milled using mixer mill MM301 (Retsch) at a frequency of 20 Hz for 2 min at 4°C. After that, frozen powder was extracted with 20 fold volume of extraction solvent (chloroform/methanol/water[50 : 100 : 31.45, v/v]) containing 1 μM of 1,2-didecanoyl-*sn*-glycero-3-phosphocholine (SIGMA). Samples were vigorously mixed using a vortex mixture. 52.6 μl of water and 52.6 μl of chloroform were added to 200 μl of extract and then vigorously mixed for 5 min at room temperature. After standing for 15 min on ice, the samples were centrifuged at 1,000 × g at 5°C for 5 min. The lower layer (85 μl) was transferred to a 2 ml tube. Each extract was evaporated to dryness by SPD2010 SpeedVac® concentrator (Thermo Fisher Scientific). The residue was dissolved in 162 μl of ethanol, and centrifuged at 10,000×g at 5°C for 15 min. The supernatant was transferred to a glass insert and subjected to lipid analysis by LC-MS.

## **2.2. Analytical conditions**

### **2.2.1. GC-TOF-MS conditions**

Using the splitless mode of a CTC CombiPALautosampler (CTC Analytics, Zwingen, Switzerland), 1 μl of each sample (equivalent to 5.6 μg DW) was injected into an Agilent 6890N gas chromatograph (Agilent Technologies, Wilmington, DE, USA) featuring a 30 m × 0.25 mm inner diameter fused-silica capillary column and a chemically bound 0.25-μl film Rxi-5 Sil MS stationary phase (RESTEK, Bellefonte, PA, USA) with a tandem connection to a fused silica tube (1 m, 0.15 mm). An MS column change interface (msNoVent-J; SGE, Yokohama, Japan) was used to prevent air and water from entering the MS during column change-over. Helium was the carrier gas at a constant flow rate of 1 ml min<sup>-1</sup>. The temperature program for GC-MS analysis started with a 2-min isothermal step at 80°C followed by 30°C temperature-ramping to a final temperature of 320°C that was maintained for 3.5 min. The transfer line and the ion source temperatures were 250 and 200°C, respectively. Ions were generated by a 70-eV electron beam at an ionization current of 2.0 mA. The acceleration voltage was turned on after a solvent delay of 222 sec. Data acquisition was on a Pegasus IV TOF mass spectrometer (LECO, St. Joseph, MI, USA); the acquisition rate was 30 spectras<sup>-1</sup> in the mass range of a mass-to-charge ratio of  $m/z = 60-800$ .

Alkane standard mixtures (C8 - C20 and C21 - C40) purchased from Sigma-Aldrich (Tokyo, Japan) were used for calculating the retention index (RI)<sup>1</sup>. For quality control we injected methylstearate into every 6th sample. The sample run order was randomized in single-sequence analyses. We analyzed the standard compound mixtures using the same sequence analysis procedures.

### **2.2.2. LC-q-TOF-MS conditions to detect secondary metabolites**

After preparation of the extracts, the sample extracts (1 µl) were analyzed using an LC-MS system equipped with an electrospray ionization (ESI) interface (LC, Waters Acquity UPLC system; MS, Waters Xevo G2 Q-ToF). The analytical conditions were as follows. LC: column, Acquity bridged ethyl hybrid (BEH) C18 (pore size 1.7 µm, length 2.1× 100 mm, Waters); solvent system, acetonitrile(0.1% formic acid):water (0.1% formic acid); gradient program,

0.5 : 99.5 v/v at 0 min, 0.5 : 99.5 v/v at 0.1 min, 80 : 20 v/v at 10 min, 99.5 : 0.5 v/v at 10.1 min, 99.5 : 0.5 v/v at 12 min and 0.5 : 99.5 v/v at 12.1 min, 0.5 : 99.5 v/v at 15 min; flow rate, 0.3 ml/min; temperature, 40 °C; MS detection: capillary voltage, +3.0 keV, cone voltage, 25.0 V, source temperature, 120°C, desolvation temperature, 450 °C, cone gas flow, 50 l/h; desolvation gas flow, 800 l/h; collision energy, 6 V; mass range,  $m/z$  50–1500; scan duration, 0.1 sec; interscan delay, 0.014 sec; mode, centroid; polarity, negative; Lockspray (Leucineenkephalin): scan duration, 1.0 sec; interscan delay, 0.1 sec. The data were recorded using Progenesis CoMet (Nonlinear Dynamics).

### **2.2.3. LC-q-TOF-MS conditions to detect lipids**

Sample extracts (1 µl) were analyzed using an LC-MS system equipped with an electrospray ionization (ESI) interface (HPLC, Waters Acquity UPLC system; MS, Waters Xevo G2 Qtof). Two-solvent (A and B) system was used for separation of each metabolite. Compositions of these solvents were as follows: solvent A, acetonitrile: water:1 M ammonium acetate:formic acid = (158 g:800g:10 ml:1 ml); solvent B, acetonitrile:2-propanol:water:1 M ammonium acetate:formic acid = (79 g:711 g:10 ml:1 ml). The analytical conditions were as follows. HPLC: column, Acquity UPLC HSS T3 (pore size 1.8 µm, 1.0 i.d × 50 mm long, Waters); gradient program, 35% B at 0 min, 70% B at 3 min, 85% B at 7 min, 90% B at 10 min, 90% B at 12 min and 35% B at 12.5 min; flow rate, 0.15 ml/min; temperature, 55°C; MS detection: capillary voltage, +3.0 kV; cone voltage, 20 V for positive mode and 40 V for negative mode; source temperature, 120°C; desolvation temperature, 450°C; cone gas flow, 50 l/h; desolvation gas flow, 450 l/h; collision energy, 6 V; detection mode, scan ( $m/z$  100–

2000; scan time, 0.5 sec; centroid). The scans were repeated for 15 min in a single run. The data were recorded using MassLynx version 4.1 software (Waters).

### **2.3. Data processing**

#### **2.3.1. Data processing for GC-TOF-MS data**

Nonprocessed MS data from GC-TOF-MS analysis were exported in NetCDF format generated by chromatography processing- and mass spectral deconvolution software (LecoChromaTOF version 3.22; LECO, St. Joseph, MI, USA) to MATLAB 6.5 or MATLAB2011b (Mathworks, Natick, MA, USA) for the performance of all data-pretreatment procedures, e.g. smoothing, alignment, time-window setting H-MCR, and RDA<sup>2</sup>. The resolved MS spectra were matched against reference mass spectra using the NIST mass spectral search program for the NIST/EPA/NIH mass spectral library (version 2.0) and our custom software for peak-annotation written in JAVA. Peaks were identified or annotated based on their RIs, a comparison of the reference mass-spectra with the GolmMetabolome Database (GMD) released from CSB.DB<sup>3</sup>, and our in-house spectral library. The metabolites were identified by comparison with RIs from the library databases (GMD and our own library) and the RIs of authentic standards. The metabolites were defined as annotated metabolites after comparison with the mass spectra and the RIs from these two libraries. The data matrix was normalized using the CCMN algorithm for further analysis<sup>4</sup>.

#### **2.3.2. Data processing for LC-q-TOF-MS data to detect secondary metabolites**

The data matrix was aligned by Progenesis CoMet (Nonlinear Dynamics). For normalization, intensity values of remained peaks was divided by those of the 10-camphorsulfonic acid ( $[M-H]^-$ ,  $m/z$  231.0691) after cutoff of the low-intensity peaks (less than 2000). Metabolite annotation was performed using a literature<sup>5</sup>.

#### **2.3.3. Data processing for LC-q-TOF-MS data to detect lipids**

The data matrix was generated using the MassLynx XS (Waters) using the profiling data files recorded in the MassLynx format (raw). The data matrices were processed using in-house Perl script. The original peak intensity values were divided with that of the internal standard (1,2-didecanoyl-*sn*-glycero-3-phosphocholine at  $m/z$  566.382  $[M + H]^+$  and at  $m/z$  610.372  $[M + HCOO]^-$  for the positive and negative ion modes, respectively) to normalize the peak intensity values among the metabolic profile data.

#### 2.4. Statistical data analysis for metabolite profile data

The multi-platform data was summarized by unifying metabolite identifiers to a common referencing scheme using the MetMask tool <sup>6</sup>. The three matrices were then concatenated and correlated peaks with the same annotation were replaced by their first principal component. Principal component analysis (PCA) and orthogonal partial least square discriminant analysis (O2PLS-DA) were performed with log<sub>10</sub> transformation and autoscaling using SIMCA-P 14.0 software (Umetrics AB, Umeå, Sweden).

#### References

- 1 Schauer, N. *et al.* GC-MS libraries for the rapid identification of metabolites in complex biological samples. *FEBS Lett* **579**, 1332-1337, doi:10.1016/j.febslet.2005.01.029 (2005).
- 2 Jonsson, P. *et al.* Predictive metabolite profiling applying hierarchical multivariate curve resolution to GC-MS data--a potential tool for multi-parametric diagnosis. *Journal of proteome research* **5**, 1407-1414, doi:10.1021/pr0600071 (2006).
- 3 Kopka, J. *et al.* GMD@CSB.DB: the Golm Metabolome Database. *Bioinformatics* **21**, 1635-1638, doi:10.1093/bioinformatics/bti236 (2005).
- 4 Redestig, H. *et al.* Compensation for systematic cross-contribution improves normalization of mass spectrometry based metabolomics data. *Anal Chem* **81**, 7974-7980, doi:10.1021/ac901143w (2009).
- 5 Abu-Reidah, I. M., Contreras, M. M., Arraez-Roman, D., Segura-Carretero, A. & Fernandez-Gutierrez, A. Reversed-phase ultra-high-performance liquid chromatography coupled to electrospray ionization-quadrupole-time-of-flight mass spectrometry as a powerful tool for metabolic profiling of vegetables: *Lactuca sativa* as an example of its application. *J Chromatogr A* **1313**, 212-227, doi:10.1016/j.chroma.2013.07.020 (2013).
- 6 Redestig, H. *et al.* Consolidating metabolite identifiers to enable contextual and multi-platform metabolomics data analysis. *BMC Bioinformatics* **11**, 214, doi:10.1186/1471-2105-11-214 (2010).
